1 **Authors:** Li Zhang<sup>1,3</sup>, Ruci Wang<sup>1</sup>, Yueming Wang<sup>1</sup>, Yufang Xu<sup>1,3</sup>, Shuang Fang<sup>2</sup>,  
2 Jinfang Chu<sup>2</sup>, Shanguo Yao<sup>1,\*</sup>

3 <sup>1</sup> State Key Laboratory of Plant Genomics, Institute of Genetics and Developmental  
4 Biology, The Innovative Academy of Seed Design, Chinese Academy of Sciences,  
5 Beijing 100101, China

6 <sup>2</sup> National Centre for Plant Gene Research (Beijing), Institute of Genetics and  
7 Developmental Biology, Chinese Academy of Sciences, Beijing 100101, China.

8 <sup>3</sup> University of Chinese Academy of Sciences, Beijing 100039, China

9 **Corresponding author:** Shanguo Yao (sgyao@genetics.ac.cn)

10 **Title:** Separable regulation of *POWI* in *TAF2*-mediated grain development and  
11 BR-mediated leaf angle formation in rice

12 **Short title:** *POWI* for grain size and leaf angle development in rice

13 **Material distribution:** The author responsible for distribution of materials integral to  
14 the findings presented in this article in accordance with the policy described in the  
15 Instructions for Authors ([www.plantcell.org](http://www.plantcell.org)) is: Shanguo Yao (sgyao@genetics.ac.cn).

16

17

18

19

20

21

22

23

24

25

26

27

28

29

30

31 **ABSTRACT**

32

33 Leaf angle is one of the key factors determining rice plant architecture. However,  
34 improvement of the leaf angle appears to be unsuccessful in practical breeding  
35 because of the simultaneous occurrence of unfavorable traits such as grain size  
36 reduction. In this study, we identified the *pow1* (*put on weight 1*) mutant with enlarged  
37 grain size and leaf angle, typical brassinosteroid (BR)-related phenotypes caused by  
38 excessive cell proliferation and cell expansion. We show that *POW1* encodes a novel  
39 protein functioning in grain size regulation by repressing the transcription activity of  
40 the interacting protein TAF2, a highly conserved member of the transcription  
41 initiation complex TFIID. Loss of function of *POW1* increases the phosphorylation of  
42 OsBZR1 and decreases the inhibitory effect of OsBZR1 on the transcription of BR  
43 biosynthesis genes *OsDWARF4* (*D4*) and *D11*, thus participates in BR-mediated leaf  
44 angle regulation. The separable functions of *POW1* in grain size and leaf angle control  
45 provide a promising strategy to design high-yielding varieties in which both traits  
46 would be favorably developed, i.e., compact plant architecture and increased grain  
47 size, thus would promote the high-yield breeding a step forward in rice.

48

49 **Keywords:** Rice, *POW1*, *TAF2*, Grain size, Leaf angle, Brassinosteroid.

50

51

52

53

54

55

56

57

58

59

---

60 **INTRODUCTION**

61

62 Rice is one of the most important food crops worldwide, and increasing grain yield  
63 remains the major challenge for most rice growing areas. The grain yield of rice is  
64 determined by three major factors, including the number of panicles per unit area,  
65 number of filled grains per panicle, and grain weight. To date, extensive attention has  
66 been paid to grain size because it is a major trait that determines grain weight and thus  
67 final yield in cereal crops, and it is one of the major targets to be selected during  
68 domestication and breeding. Grain size is specified by three components, including  
69 the length, width and thickness, and many genes or QTLs have recently been  
70 identified for their function in grain size regulation (Zuo and Li, 2014; Li et al., 2018).  
71 These regulators could be classified into multiple pathways, including  
72 mitogen-activated protein kinase signaling, ubiquitin mediated degradation, G protein  
73 signaling, phytohormone signaling, and transcriptional regulation, and all these  
74 pathways control grain size by ultimately affecting the same cellular processes of cell  
75 proliferation and/or cell expansion in the spikelet hull (Li et al., 2018). However, the  
76 molecular mechanisms underlying most of the regulators of grain size control remain  
77 largely unknown.

78

79 As another key factor that determines rice grain yield, the number of panicles per unit  
80 area is affected by the plant tillering ability and planting density, and the latter largely  
81 depends on plant architecture. Among the factors involved in determining plant  
82 architecture, BR shows great potential in improving this trait for its remarkable  
83 function in rice leaf angle regulation and grain size control (Tong and Chu, 2018). An  
84 erect leaf angle is beneficial for a higher plant density and more light capture for  
85 photosynthesis (Tian et al., 2019), which would thus result in a grain yield increase  
86 (Sakamoto et al., 2006). To date, studies on BR have exposed the double faced  
87 function of the phytohormone in plant development, i.e., compact stature brought by  
88 BR deficiency is always accompanied by small grain size, such as *d11*, *d2*, *brd1*, *dlt*,

---

89 *d61-1* and *d61-2* (Yamamuro et al., 2000; Mori et al., 2002; Hong et al., 2003; Tanabe  
90 et al., 2005; Tong et al., 2009), while an enlarged grain size resulting from an  
91 excessive amount of BR often develops along with a loose stature, such as that  
92 observed for *OsBZR1*-OE, *GSK2*-RNAi, and *D11*-OE transgenic plants (Tong et al.,  
93 2012; Zhu et al., 2015). Fortunately, exceptions were observed for several cases. For  
94 example, mutation of *D4* results in plants with erect leaves without a grain size  
95 change because *D4* only contributes additional levels of bioactive BR synthesis  
96 required for normal leaf inclination and not for reproductive development (Sakamoto  
97 et al., 2006), and transgenic plants with a slightly decreased *OsBR11* expression level  
98 exhibit a reduced leaf angle and unchanged grain size (Morinaka et al., 2006).  
99 Although grain size reduction was prevented successfully in these researches during  
100 plant architecture modification, the question arises as to whether we could raise rice  
101 plants with both traits favorably developed, i.e., a reduced leaf angle and an increased  
102 grain size.

103

104 Plant organs all achieve their final size and shape via common paths of cell division  
105 and cell expansion. Therefore, numerous reports have been dedicated to identify the  
106 way to the ultimate regulation of the genes related to these cellular processes. TAFs  
107 (TATA-box binding protein Associated Factors), as components of the TFIID complex  
108 critical for eukaryotic gene transcription (Gupta et al., 2016; Nogales et al., 2017), are  
109 reported to be essential for cell cycle progression. A TS mutation in CCG1/TAF1 in  
110 hamster cells provokes G<sub>1</sub>/S arrest (Sekiguchi et al., 1991), and TAF9 inactivation in  
111 chicken DT40 cells causes cell cycle arrest and apoptosis (Chen and Manley, 2000).  
112 Mouse cells that lacked TAF10 were found to be blocked in the G<sub>1</sub>/G<sub>0</sub> phase and  
113 underwent apoptosis (Metzger et al., 1999), and a subset of TAF4b-target genes  
114 preferentially expressed in embryonic stem cells to be involved in cell cycle control  
115 (Bahat et al., 2013). Studies have also indicated that TAFs could interact with specific  
116 transcription factors (Reeves and Hahn, 2005; Garbett et al., 2007), transcription  
117 activators (Rojo Niersbach et al., 1999; Asahara et al., 2001), and components

---

118 involved in epigenetic modification (Jacobson et al., 2000; Lindner et al., 2013).  
119 Although TAFs are categorized as general transcription factors, studies in *Arabidopsis*  
120 has revealed their functions in specific plant developmental processes such as light  
121 signaling (Bertrand et al., 2005), flowering time (Eom et al., 2018), pollen tube  
122 growth (Lago et al., 2005), and meristem activity and leaf development (Tamada et al.,  
123 2007). Nevertheless, more studies are required to fully expand our knowledge on  
124 TAFs in rice.

125

126 In this study, we characterized *pow1*, a recessive rice mutant with expanded grain size  
127 and enlarged leaf angle. We show that *POW1* encodes a novel protein with no  
128 transactivation activity, and functions in grain size regulation by repressing the  
129 transcriptional activity of the interactor TAF2, a highly conserved member of the  
130 TFIID complex. Loss of function of *POW1* increases the phosphorylation of OsBZR1,  
131 and decreases the inhibitory effect of OsBZR1 on the transcription of BR biosynthesis  
132 genes. Our results suggest that POW1 functions both upstream and downstream of BR  
133 signaling pathway, thus affects leaf angle formation by participating in BR  
134 homeostasis maintenance. The separable functions of *POW1* in grain size and leaf  
135 angle control provide a novel strategy to design rice plants in which both traits would  
136 be favorably developed.

137

## 138 **RESULTS**

139

### 140 **Phenotypic analysis of the *pow1* mutant**

141

142 By screening the NaN<sub>3</sub>-mutagenized M<sub>2</sub> library in the background of the *japonica* rice  
143 cultivar KY131, we isolated a mutant with remarkably enlarged grain length, width  
144 and thickness compared to that of the wild type (WT, Figures 1A to 1C). The increase  
145 could reach approximately 20.0% for grain length, 23.2% for grain width, and 23.7%  
146 for grain thickness (Figure 1D), and the mutant was then designated *pow1* (*put on*

---

147 *weight 1*). Planting of the M<sub>3</sub> population indicated that *pow1* displayed a loose plant  
148 architecture (Figure 1E), as featured by the near evenly extended flag leaf (Figure 1F).  
149 Detailed observation indicated that the leaf angle of *pow1* was approximately 98°,  
150 compared to approximately 34° of that of the WT. In addition, *pow1* also showed an  
151 overall expanded size of plant organs, including panicle, culm, leaf and all  
152 reproductive tissues (Supplemental Figure 1), suggesting the fundamental role of  
153 *POW1* during rice development.

154  
155 Scanning Electron Microscope (SEM) observation indicated that the outer epidermal  
156 cells in the central region of the lemma in *pow1* were longer and wider than those in  
157 the WT (Figures 2A to 2C), and the increased size in the two dimensions was also  
158 confirmed by the comparison of the inner epidermal cells between *pow1* and the WT  
159 (Supplemental Figures 2A and 2B). The cell size increases in length (17.9%) and  
160 width (18.8%) were less than that of the grain size increase (Figure 1D), suggesting  
161 that *POW1* affects cell expansion, as well as cell division during grain development.

162  
163 The effects of *POW1* on the cellular processes of cell division and cell expansion  
164 were further observed for the enlarged leaf angle of the mutant. We found that before  
165 the leaf angle formed, no size difference could be observed for cells in the adaxial  
166 side of the lamina joint between *pow1* and the WT, whereas the number of cell layers  
167 from the vascular bundle of xylem to the margin was clearly more in *pow1* (6~7) than  
168 that in the WT (3~4) (Supplemental Figure 3A), indicating the involvement of *POW1*  
169 in cell division. During the formation of the leaf angle, the number of cell layers in the  
170 adaxial side of the lamina joint increased in both *pow1* (8~10) and the WT (6~7)  
171 (Supplemental Figure 3B). Although cell growth was observed for both the WT and  
172 *pow1* during this stage, the increase in the cell size was much obvious in *pow1* than  
173 that in the WT (Supplemental Figures 3A and 3B), suggesting that *POW1* also  
174 functions in cell expansion.

175

---

176 Investigation of the expression of cell cycle and cell expansion related genes indicated  
177 that in both young inflorescence and lamina joint, *pow1* exhibited much higher  
178 expression levels of the cell division marker genes, such as *MCM3*, *CYCB2*, and  
179 *RAN2*, and the cell expansion marker genes, such as *XTR2* and *EXPA2* (Duan et al.,  
180 2012; Jiang et al., 2012) (Figures 2D and 2E). These results are well consistent with  
181 the phenotypic observations that *POWI* functions in grain size and leaf angle  
182 development by ultimately affecting both cell division and cell expansion.

183

#### 184 ***POWI* is ubiquitously expressed and encodes a protein with unknown function**

185

186 To understand the molecular function of *POWI*, we cloned the causal gene by  
187 map-based cloning. After sequencing of the fine-mapped region, we found a single  
188 mutation from G to T occurred in *pow1* in an annotated gene *Os07g07880*  
189 (<http://rice.plantbiology.msu.edu/>), which caused an amino acid change from Arginine  
190 to Serine (Figure 3A).

191

192 To verify that *Os07g07880* is actually *POWI*, genomic DNA, including 2.2-kb  
193 upstream of ATG and 948-bp downstream of TGA, was amplified from the WT and  
194 transformed into *pow1*. We found that all 38 T<sub>0</sub> transgenic plants showed overall  
195 phenotypes, including grain size and leaf angle, resembling that of the WT (Figures  
196 3B and 3C), demonstrating that the *pow1* phenotypes are caused by the point mutation  
197 in *Os07g07880*.

198

199 *POWI* is ubiquitously expressed in all tissues, including the root, embryo, stem,  
200 inflorescence, flag leaf and lamina joint (Figure 3D), which fits well with the  
201 expanded size of all organs in the mutant (Figure 1 and Supplemental Figure 1). The  
202 highest expression of *POWI* was observed in young panicles, and the expression level  
203 of the gene decreased during panicle maturation (Figure 3D). This result suggests that  
204 *POWI* plays a critical role in early inflorescence development.

---

205 *POW1* is predicted to encode a homeodomain-like protein with a putative  
206 Helix-Turn-Helix DNA binding structure and a DDE domain (Figure 3E, Yuan and  
207 Wessler, 2011). Although *POW1* appeared to belong to the superfamily of Harbinger  
208 DNA transposons that possess nuclease activity (Kapitonov and Jurka, 1999), the  
209 typical catalytic DDE domain was disturbed in *POW1* (Supplemental Figure 4). This  
210 observation suggests that *POW1* might lose the activity as a transposase (Kapitonov  
211 and Jurka, 2004) and obtain a new function during the evolution, such as that reported  
212 for the *Arabidopsis* homolog *ALP1* (Kapitonov and Jurka, 2004; Liang et al., 2015).

213

214 In most of the cells ( $\approx 90\%$ ), *POW1* is exclusively observed in the nucleus. However,  
215 for a small portion of cells ( $\approx 10\%$ ), we found that *POW1* is also localized in the  
216 cytoplasm and membrane, as well as the nucleus (Figure 3F). Because *POW1*  
217 contained a putative DNA binding domain and mostly localized in the nucleus, we  
218 subsequently questioned whether *POW1* functions as a transcription factor. However,  
219 we could not detect any transactivation activity of *POW1* in yeast (Supplemental  
220 Figure 5A). We further performed the transcription activity assay in rice protoplast  
221 using the luciferase coding gene as a reporter. When we transformed the  
222 GAL4-BD-*POW1* fusion protein into rice protoplast, we only observed a 1.5-fold  
223 change in the luciferase expression level compared to that of the negative control  
224 (Supplemental Figure 5B). In conclusion, these results suggest that *POW1* is neither a  
225 transcriptional activator nor a repressor.

226

### 227 ***POW1* affects leaf angle formation via BR pathway**

228

229 The increase in leaf angle is the typical phenotype displayed by plants with an  
230 excessive amount of BR. In particular, the loose population structure of *pow1* highly  
231 resembled plants that ectopically express *At-CYP90B1* or *Zm-CYP* (Wu et al., 2008),  
232 which are homologs of rice *D4* and *D11*, respectively. Therefore, we first quantified  
233 the endogenous BR content in the mutant. We found that the content of castasterone, a



234 likely end product of the BR biosynthetic pathway in rice(Kim et al., 2008), was  
235 obviously higher in *pow1* than that in the WT (Figure 4A). Consistent with the higher  
236 endogenous BR content, we found that the expression levels of BR biosynthesis genes  
237 in the mutant were enhanced for *D4* in the flag leaves and *D11* in the young  
238 inflorescence, while the expressions of the other two genes *BRD1* and *D2* were not  
239 significantly changed between *pow1* and the WT (Figure 4B). The elevated BR level  
240 in the mutant was further confirmed by seedling treatment with Brassinazole (BRZ), a  
241 BR biosynthesis inhibitor that specifically blocks BR biosynthesis by inhibiting the  
242 cytochrome P450 steroid C-22 hydroxylase encoded by the *DWF4* gene (Asami et al.,  
243 2001). We found that the position of the second lamina joint in *pow1* was obviously  
244 higher than that in the WT under control conditions, and the phenotype of *pow1*  
245 seedlings treated with 5  $\mu$ M BRZ highly mimicked that of the WT without BRZ  
246 treatment (Figure 4C). Taken together, these results indicate that *pow1* is a  
247 BR-overproducing mutant.

248

249 To verify whether the mutant phenotype was caused by ectopic expression of the BR  
250 biosynthesis genes *D4* and *D11*, we constructed RNAi transgenic plants of the two  
251 genes under *pow1* background. We could not observe phenotypic recovery in the *D4*  
252 or *D11* single RNAi transgenic plants (Figures 4D and 4E), which might be due to the  
253 higher expression level of the other gene (Supplemental Figure 6A). When  
254 simultaneously knocking down these two genes (Supplemental Figure 6A), we found  
255 that the *pow1*<sup>*D4-D11-RNAi*</sup>-3 plant exhibits a leaf angle much smaller than *pow1*, and the  
256 leaf angle of *pow1*<sup>*D4-D11-RNAi*</sup>-7 is comparable to that of *D4* and *D11* double RNAi  
257 transgenic plants under the WT background (*POWI*<sup>*D4-D11-RNAi*</sup>; Figure 4D), which  
258 suggests that *POWI* controls leaf angle formation by regulating the transcription of  
259 *D4* and *D11*. Unexpectedly, we could not observe remarkable changes in grain size in  
260 all double RNAi lines under the *pow1* background, although the grain size of the  
261 *POWI*<sup>*D4-D11-RNAi*</sup> plant is sharply reduced compared to that of the WT (Figure 4E and  
262 Supplemental Figure 6B).

---

263 In addition to BR biosynthesis, altered BR signaling could also affect grain size  
264 development (Yamamuro et al., 2000; Zhu et al., 2015). Our BRZ treatment indicated  
265 that *pow1* showed alleviated inhibition under 20  $\mu$ M BRZ conditions (Figure 4C),  
266 suggesting that *POW1* might be involved in the BR signaling pathway. We then  
267 performed a lamina joint bending assay and found that the lamina joint bending angle  
268 in *pow1* was larger than that in the WT under all brassinolide (BL) concentrations  
269 (Figure 5A and Supplemental Figure 7A). Because coleoptile growth under BR  
270 treatment is an important BR responsive phenotype (Yamamuro et al., 2000), we  
271 further detected the coleoptile length of *pow1* and WT seedlings under a series of BL  
272 concentrations. No clear difference could be observed for the growth rate of coleoptile  
273 between *pow1* and the WT under the low BL concentrations; however, *pow1*  
274 displayed a 36% more increase in the coleoptile length than in the WT under 5  $\mu$ M BL  
275 treatment (Figure 5B and Supplemental Figure 7B). These results suggest that *POW1*  
276 is involved in BR signaling, as well as BR biosynthesis.

277

278 Consistent with the hypersensitive response of *pow1* to BR, we found that expression  
279 of the genes positively involved in BR signaling, including *OsBR11*, *RAV11*, *IL11* and  
280 *OsBZR1*, was all significantly induced under the mutant background (Supplemental  
281 Figure 7C). Therefore, we attempted to understand whether BR signaling participates  
282 in *POW1*-mediated grain size regulation by crossing *pow1* with *d61-1* and *d61-2*, two  
283 allelic mutants of the BR receptor gene *OsBR11* that show less sensitivity to BL than  
284 their relative WT (Yamamuro et al., 2000). To exclude the background noise, we  
285 selected double mutants and single mutants from the same genetic population for  
286 phenotypic comparison. We found that the leaf angle of the double mutant  
287 *pow1/d61-2* is completely recovered to that of the *POW1/d61-2* single mutant, while  
288 the leaf angle in *pow1/d61-1* is only partially rescued compared to that in  
289 *POW1/d61-1* (Figures 5C and 5D; Supplemental Figures 8A and 8B), which should  
290 be because *d61-1* is a weak allele (Yamamuro et al., 2000). Surprisingly, we could not  
291 yet observe any difference in the grain size among *pow1/D61-1*, *pow1/D61-2* and the

---

292 double mutants (Figures 5E and 5F; Supplemental Figures 8C and 8D). These results  
293 suggest that POW1 regulates grain size downstream of BR signaling.

294

### 295 **POW1 interacts with and regulates grain size through TAF2**

296

297 The BR biosynthesis genes *D4* and *D11* show altered transcription under the *pow1*  
298 background (Figure 4B), whereas POW1 does not appear to function as a transcription  
299 factor (Supplemental Figures 5A and 5B). We first speculated that POW1 might act as  
300 an epigenetic regulator like its *Arabidopsis* homolog ALP1 (Liang et al., 2015).  
301 However, this possibility was excluded because no significant alteration in the  
302 H3K27me3 levels was observed within either *D4* or *D11* gene locus (Supplemental  
303 Figure 5C). Therefore, we queried whether POW1 carries out transcriptional  
304 regulation by associating with other factors (Sridhar et al., 2006; Jiang et al., 2018).  
305 To this end, we screened its potential interactors using a cDNA library with the yeast  
306 two-hybrid system. Among the 274 sequenced positive colonies, we were highly  
307 interested in one POW1-interacting insert (Figures 6A to 6C), which is the C-terminus  
308 of *Os09g24440* (<http://rice.plantbiology.msu.edu/>) predicted to encode the  
309 transcription initiation factor TFIID subunit 2 (TAF2,  
310 [https://www.ncbi.nlm.nih.gov/nucleotide/XM\\_015756386.2](https://www.ncbi.nlm.nih.gov/nucleotide/XM_015756386.2)). As a highly conserved  
311 member, TAF2 plays a crucial role in cell cycle progression (Lago et al., 2004), which  
312 is closely related to the function of *POW1* (Figures 2D and 2E). Therefore, we  
313 speculated that these two factors might work as a complex to mediate rice  
314 development. Because *TAF2* has no paralogs in the rice genome  
315 (<https://blast.ncbi.nlm.nih.gov/Blast>), and knockout of the core components, such as  
316 *TAF1* or *TAF6*, typically causes a lethal phenotype (Lago et al., 2005; Waterworth et  
317 al., 2015), we constructed *TAF2*-RNAi transgenic plants under the WT background to  
318 study its function. Among the 52 independent transgenic lines, we selected three lines  
319 that showed differentially repressed expression of *TAF2* for phenotypic analysis. We  
320 found that all the three lines exhibited phenotypes contrary to that of *pow1*, including

---

321 a reduced grain size, decreased leaf angle, and shortened plant height compared to  
322 those of WT (Figures 7A to 7C), and the grain size reduction in the *TAF2*-RNAi plants  
323 was due to the decrease in both cell size and cell number (Supplemental Figure 9).  
324 Consistently, we found that expression of the cell division markers, such as *MCM3*  
325 and *CYCB2*, and the cell expansion gene *EXPA2*, was all repressed along with the  
326 downregulation of *TAF2* (Figure 7D), which is in sharp contrast to the upregulation of  
327 these genes under the *pow1* background (Figures 2D and 2E). We further observed  
328 that as a predicted transcription initiation factor, TAF2 could activate significantly the  
329 expression of all the three marker genes (Figure 7E and Supplemental Figure 10A),  
330 which explained well the differential expression of these genes between WT and  
331 *TAF2*-RNAi transgenic plants (Figure 7D). Furthermore, we found that the activation  
332 activity of TAF2 on *CYCB2* could be significantly repressed by POW1, while the  
333 mutated protein (mPOW1) showed opposite effect on *CYCB2* expression (Figure 7F  
334 and Supplemental Figure 10B). By contrast, there was no significant difference  
335 between POW1 and mPOW1 in the activation of *MCM3* and *EXPA2* by TAF2 (Figure  
336 7F and Supplemental Figure 10B), indicating that the upregulated expression of these  
337 genes in *pow1* is not due to the differential effects of POW1 and mPOW1 on TAF2  
338 activation activity. Because the expression level of *TAF2* was obviously higher in  
339 *pow1* than that in WT (Figure 6D), the upregulated expression of *MCM3* and *EXPA2*  
340 in the mutant should be due to the more accumulated transcription activator TAF2.  
341 Totally, these observations indicate that POW1 antagonizes TAF2 in regulating  
342 downstream gene transcription, and the lifted repression on the transactivation activity  
343 of TAF2 by mPOW1 well explained that in the inflorescence with the highest *POW1*  
344 expression (Figure 3D), the transcription of *CYCB2* was much enhanced than that of  
345 all the other genes under the *pow1* background (Figure 2D).

346

347 Very interestingly, we found that although the leaf angle of *POW1*<sup>*TAF2*-RNAi</sup> transgenic  
348 plants appeared to be smaller than that of WT, the change of leaf angle did not seem to  
349 be proportional to the expression level of *TAF2* (Figures 7B and 7C). Therefore, we

---

350 further explored the function of *TAF2* in *POW1*-mediated leaf angle regulation by  
351 creating the *TAF2*-RNAi transgenic plants under the mutant background (Figures 8A  
352 and 8D). We found that knockdown of *TAF2* could largely recover the grain size of  
353 *pow1* to that of the WT (Figures 8B and 8F). However, the enlarged leaf angle  
354 phenotype remained unchanged in these transgenic plants (Figure 8C), and  
355 longitudinal sections of the lamina joint of *TAF2*-RNAi transgenic plants showed that  
356 downregulation of *TAF2* did not affect cell elongation during leaf angle formation  
357 (Supplemental Figure 11), although significant effect of this gene on cell elongation  
358 was observed during grain development (Supplemental Figure 9). These results  
359 suggest that *TAF2* is not involved in *POW1*-mediated leaf angle formation. This  
360 conclusion was further supported by analyzing the expression levels of *D4* and *D11* in  
361 these transgenic plants because the large leaf angle of *pow1* is due to the upregulation  
362 of these two genes (Figure 4D). We found that in the *pow1*<sup>*TAF2*-RNAi</sup> plants, the  
363 expression levels of these two genes were substantially decreased compared with that  
364 in *pow1* but significantly higher than that in the WT (Figure 8E), which might explain  
365 the unchanged leaf angle phenotype in these plants. Therefore, we constructed  
366 transgenic plants with simultaneously downregulated expression of *TAF2*, *D4* and  
367 *D11* under the mutant background, and the triple RNAi transgenic plants  
368 *pow1*<sup>*TAF2-D11-D4*-RNAi</sup> displayed largely rescued phenotypes similar to that of the WT,  
369 i.e., decreased grain size and erect leaf angle (Figure 8). These results further  
370 demonstrate that *POW1* controls leaf angle formation via the BR pathway and  
371 regulates grain size development under the assistance of *TAF2*.

372

### 373 ***POW1* is negatively involved in BR homeostasis possibly via *GL7***

374

375 Our genetic analysis clearly showed that *POW1* regulates leaf angle formation by  
376 affecting the transcription of the BR biosynthesis genes *D4* and *D11* (Figure 4D). To  
377 explore how *POW1* affects the transcription of *D4* and *D11*, we focused on OsBZR1,  
378 a central transcription factor reported to mediate the negative feedback regulation of

---

379 the BR biosynthesis genes by binding directly to the promoters of *D4* and *D11* (Bai et  
380 al., 2007; Qiao et al., 2017). Although we could not detect any interaction between  
381 POW1 and OsBZR1 (Supplemental Figure 12), we found that OsBZR1 showed more  
382 cytoplasm retention in *pow1* than that in WT (Figures 9A and 9B). This is quite  
383 interesting because previous studies have proven that BL induction could induce the  
384 nuclear localization of OsBZR1 (Bai et al., 2007), in contrast to the higher BR content  
385 and more cytoplasm retention of OsBZR1 under the *pow1* background. Because the  
386 subcellular localization of OsBZR1 fully reflects the phosphorylation status of the  
387 protein (Wang et al., 2012), we therefore analyzed the phosphorylation of OsBZR1 in  
388 *pow1* and WT. We found that *pow1* possessed more phosphorylated OsBZR1 than WT  
389 (Figure 9C), which is consistent well with the cytoplasm retention of OsBZR1 in the  
390 mutant. Furthermore, we also observed that the inhibitory effect of OsBZR1 on the  
391 expression of *D4* and *D11* is obviously reduced in *pow1* compared to that in WT  
392 (Figure 9D and Supplemental Figure10C), which should be due to the less nuclear  
393 localized OsBZR1 protein. Moreover, we found that similar to that observed in the  
394 BR-deficient mutants (Hong et al., 2003), the expression of *POW1* was highly  
395 enhanced in the *pow1* mutant (Figure 9E), which may represent a self-compensation  
396 effect for the mutation. And, application of exogenous BL could effectively induce the  
397 expression of *POW1* (Figure 9F). Taken together, these results suggest that POW1 is a  
398 key regulator of OsBZR1-mediated BR negative feedback loop, and is important for  
399 the stable nuclear localization of OsBZR1 when the endogenous BR content is high.

400

401 Although we revealed that POW1 controls the expression of *D4* and *D11* by affecting  
402 OsBZR1 phosphorylation, we could not detect a direct interaction between these two  
403 proteins (Supplemental Figure12). We hypothesized that OsBZR1 might regulate  
404 transcription by interacting with transcription initiation factors such as TAF2. To our  
405 regret, no interaction was detected between OsBZR1 and TAF2 (Figure 6B and  
406 Supplemental Figure 12). Therefore, we tried to screen the potential linkers of POW1  
407 and OsBZR1 using the yeast two-hybrid system with POW1 as the bait, and identified

---

408 the POW1-interacting protein GL7 (GW7, Figure 10), a major QTL involved in grain  
409 size regulation (Wang et al., 2015a; Wang et al., 2015b). Although GL7 did not  
410 interact directly with OsBZR1, it showed strong interaction with GSK2 (Figure 10), a  
411 kinase responsible for the phosphorylation of OsBZR1 (Liu et al., 2017). These  
412 observations suggest that GL7 might be the connexon in the regulation of OsBZR1  
413 phosphorylation by POW1. However, the detailed regulatory mechanism needs to be  
414 further studied.

415

## 416 **DISCUSSION**

417

418 Although *pow1* shows typical BR-related phenotypes of enlarged grain size and leaf  
419 angle, we provided evidence that *POW1* controls these two traits through separable  
420 routes of BR pathway and the transcription initiation factor *TAF2*, respectively. The  
421 separable functions of *POW1* in grain size and leaf angle regulation imply that *POW1*  
422 occupies a critical position in integrating these two important biological processes.

423

### 424 **POW1 acts both upstream and downstream of the BR pathway**

425

426 Loss of function of *POW1* enhanced the expression of the BR biosynthesis genes *D4*  
427 and *D11*, resulting in a higher BR content which could induce the expression of  
428 *POW1*. These results suggest that *POW1* plays a critical role in the feedback  
429 regulation of BR homeostasis, which is similar to that reported for *OsBZR1* (Bai et al.,  
430 2007). *OsBZR1* is the key transcriptional regulator of the BR pathway which binds  
431 directly to the promoters of downstream targets (Tong et al., 2012; Zhu et al., 2015;  
432 Qiao et al., 2017). However, the initiation of gene transcription depends on not only  
433 specific transcription factors but also transcription initiation complex, which is consist  
434 of TFIIA, TFIIB, TFIID, TFIIE, TFIIIF, TFIIH and RNA polymerase II (Gupta et al.,  
435 2016). So far, knowledge on the function of TAFs during rice development remains  
436 blank, and our findings show clearly that *TAF2* plays a pivotal role in cell division

---

437 and cell expansion. As the core TFIID component, TAF2 is always first recruited to  
438 the transcription initiation region (Nogales et al., 2017), thus enables the subsequent  
439 package of the mature transcription initiation complex. However, for the transcription  
440 of some inducible genes, other additional factors also participate in this basic  
441 transcription initiation process (Weake and Workman, 2010). As an important growth  
442 regulator, BR could affect rice development by inducing the expression of many genes  
443 (Tong and Chu, 2018), and OsBZR1 thus might act as an additional factor to join the  
444 *TAF2/POW1*-mediated transcription of downstream genes, including those involved in  
445 cell division and cell elongation. Because POW1 interacts with and affects the  
446 transactivation activity of TAF2, and participates in BR homeostasis through  
447 impacting on OsBZR1 phosphorylation, the BR-inducible *POW1* thus functions  
448 possibly both upstream and downstream of *OsBZR1*-mediated BR signaling. We  
449 propose that *POW1* regulates the transcription of downstream genes via a fine  
450 equilibration among OsBZR1 (BR content), TAF2 and POW1, while the equilibrium  
451 point might be different for leaf angle formation and grain size determination (Figure  
452 11).

453

454 **The cellular processes in certain tissues are variably determined by the**  
455 **equilibrium among *POW1-TAF2-OsBZR1***

456

457 As a well-studied phytohormone, BR is involved in both leaf angle formation and  
458 grain size regulation (Tong and Chu, 2018), and one of the most amazing phenomena  
459 revealed in this study is that BR only affects the development of leaf angle but not  
460 grain size under the *pow1* mutant background. This observation might be explained by  
461 that BR shows differential roles in certain tissues (Tong and Chu, 2018), and lamina  
462 joint is one of the most sensitive tissues responding to BR fluctuation (Morinaka et al.,  
463 2006). Therefore, the effect caused by reduction or increment in endogenous BR  
464 levels would be more prominent for the development of leaf angle than that of grain  
465 size. Moreover, *OsBZR1*, the central factor of the BR pathway, was reported to govern



---

466 cell elongation (Tong et al., 2014; Tong and Chu, 2018), and adaxial cell expansion  
467 was proven to be mainly responsible for the BR-induced leaf angle formation (Cao  
468 and Chen, 1995). Accordingly, the enlarged leaf angle phenotype of *pow1* could be  
469 readily rescued by manipulation of the BR pathway components. In contrast to the  
470 effect of BR on cell elongation, *TAF2* shows little effects on cell expansion during leaf  
471 angle formation, and expression of this gene is not strongly induced in the lamina  
472 joint of the *pow1* mutant. However, transcription of *TAF2* is sharply induced in the  
473 young panicle of *pow1*, resulting in drastic change in grain epidermal cell size and cell  
474 number. Although dysfunction of genes involved in BR biosynthesis and signaling  
475 could effectively modify grain development under the WT background, the grain size  
476 of *pow1*<sup>D4-D11-RNAi</sup> and *pow1/d61* plants remained unchangeable compared to that of  
477 the mutant. These results suggest that the BR pathway functions upstream of the  
478 *POW1-TAF2*-mediated cellular processes, and manipulation of the BR pathway under  
479 the *pow1* background therefore could not antagonize the enhanced transcription and  
480 transactivation activity of the downstream *TAF2* during grain size formation. We  
481 suppose that the separable functions of *POW1* in the regulation of leaf angle and grain  
482 size might be attributed to that in these two tissues, *TAF2* shows differential responses  
483 to the *pow1* mutation at the transcription level and distinct roles in cell elongation and  
484 cell division. In the lamina joint, the less induction of *TAF2* expression and the little  
485 effect of this gene on cell elongation lead to the dominant role of BR in leaf angle  
486 formation under the mutant background. Contrastingly, in the young panicle, the  
487 drastic increase of transcription and transactivation activity of *TAF2*, and the  
488 significant effect of *TAF2* on epidermal cell size and number give rise to the  
489 *TAF2*-dominated grain size development in *pow1*. In conclusion, our results indicate  
490 that *POW1* is a key and global factor in the BR pathway by affecting OsBZR1  
491 phosphorylation, and participates directly in *TAF2*-mediated cell cycle progression  
492 through influencing *TAF2* transactivation activity, thus making the *pow1* phenotype  
493 difficult to be rescued by any one of the two factors (Figure 11).

494

---

495 ***POW1* has great potential in high yield breeding**

496

497 The erect-leaf trait is considered to be the ideotype for photosynthesis, growth and  
498 grain production (Sakamoto et al., 2006), and has attracted wide attention in  
499 especially molecular design of crop varieties with high yield potential. In rice, genetic  
500 analysis has revealed that overexpression of *OsAGO7* could decrease leaf angle by  
501 inducing upward leaf curling. However, this gene also shows adverse effects on other  
502 traits such as chlorophyll content (Shi et al., 2007). Loss of function of *OsILAI* could  
503 increase leaf angle by altering vascular bundle formation and cell wall composition.  
504 However, there is no evidence that genetic manipulation of this gene could make the  
505 leaf erect (Ning et al., 2011). Many studies have shown that leaf angle development is  
506 closely related to plant hormones including auxin (Cao and Chen, 1995), BR (Tong  
507 and Chu, 2018), and gibberellin (Shimada et al., 2006), and these findings have  
508 provided valuable information for understanding the molecular mechanism  
509 controlling leaf angle formation. However, although genetic manipulation of the  
510 related genes could effectively decrease the leaf angle, many other traits such as plant  
511 height and fertility would be adversely modified. Especially, the development of leaf  
512 angle is in most cases directly or indirectly related to BR (Tong and Chu, 2018),  
513 which also affects the development of grain size, another key yield determinant.  
514 Although the decrease of leaf angle by modifying BR pathway is often accompanied  
515 by the reduction of grain size, Morinaka et al., (2006) found that moderate  
516 suppression of *OsBR11* expression could yield plants with erect-leaf phenotype  
517 without grain changes. In addition, loss of function mutant of *D4* displayed slight  
518 dwarfism and erect leaves without undesirable phenotypes such as reduction in grain  
519 size (Sakamoto et al., 2006). With standard fertilizer application, the grain yield of the  
520 *d4* mutant under dense planting increased substantially compared to that of the WT  
521 under conventional conditions. In this study, we show that *pow1* shows typical  
522 BR-related phenotypes of enlarged grain size and leaf angle. However, unlike that  
523 regulated by BR pathway genes, these two traits in *pow1* could be separately

---

524 controlled by modulating the expression of *TAF2* and *D4/D11*, respectively. The  
525 separable regulation of *POW1* in grain size and leaf angle development thus provides  
526 a promising strategy to design high-yielding varieties with not only compact plant  
527 architecture but also increased grain size, as observed in the *pow1*<sup>*D4-D11-RNAi*</sup> transgenic  
528 plants and the *pow1/d61* double mutant plants. In other words, by suppressing the  
529 expression of *TAF2* under the *pow1*<sup>*D4-D11-RNAi*</sup> background, the grain size could be  
530 freely modified without altering the erect-leaf phenotype. Therefore, compared with  
531 the previous findings (Morinaka et al., 2006; Sakamoto et al., 2006), our results  
532 described here suggest that utilization of the *POW1-TAF2-BR* pathway could promote  
533 high yield breeding a further step forward in rice.

534

## 535 **METHODS**

536

### 537 **Plant materials and growth conditions**

538

539 The *pow1* mutant was isolated from the M<sub>2</sub> population of the *japonica* cultivar KY131  
540 mutated with sodium azide. The mapping population was generated by crossing *pow1*  
541 with the *indica* cultivar Kasalath. To create the double mutants *pow1/d61-1* and  
542 *pow1/d61-2*, *pow1* was used as the female to cross with *d61-1* and *d61-2* mutants, and  
543 the resulting F<sub>1</sub> plants were backcrossed with *pow1* three times, respectively. The  
544 self-fertilized BC<sub>3</sub>F<sub>2</sub> plants were genotyped with gene specific markers to select the  
545 double plants. To exclude background noise, we also selected all single mutants from  
546 the same genetic population for phenotypic comparison. All plants used in this study  
547 were cultivated in the experimental fields in Beijing or Sanya (Hainan Province)  
548 during the natural growing season. The primers used for mutant selection are listed in  
549 Supplemental Table 1.

550

### 551 **Lamina joint assay and BL and BRZ treatments**

552

---

553 For the lamina joint assay, the second leaf laminae of 7-day-old seedlings grown in the  
554 dark were excised and submerged in distilled water that contained different  
555 concentrations of BL (Sigma), and phenotypic analysis was performed after 3 days of  
556 treatment. To observe coleoptile elongation, the seeds were sterilized with 3% NaClO,  
557 sowed on half strength solid MS medium that contained different concentrations of  
558 BL, and grew for 3 additional days after germination. For BRZ treatment, the  
559 sterilized seeds were sowed on half strength MS medium that contained 0, 5 and 20  
560  $\mu\text{M}$  BRZ and grew for one week after germination. For the BR induction assay,  
561 two-week-old seedlings cultured in a greenhouse were transplanted into half strength  
562 MS liquid medium that contained 1  $\mu\text{M}$  BL, and shoots were sampled after 0, 2, 6, 12,  
563 and 24 h treatment for qRT-PCR assay.

564

### 565 **Histological analysis**

566

567 To prepare paraffin sections, samples were fixed in FAA solution (50% ethanol, 5%  
568 acetic acid and 3.7% formaldehyde) overnight at 4°C after 15 min vacuum treatment;  
569 the samples were subsequently dehydrated with a graded ethanol series and embedded  
570 in paraplast for 2 days at 60°C. Sections (8  $\mu\text{m}$ ) were prepared with a microtome  
571 (RM2235, Leica), stained with 0.5% toluidine blue and observed with a microscope  
572 (BX53, Olympus).

573

574 For SEM analysis, glumes were collected prior to grain filling and fixed in 1 $\times$  PBS  
575 solution that contained 2.5% glutaraldehyde overnight at 4°C. After dehydration with  
576 a series of ethanol and substitution with ethyl acetate, the samples were critical-point  
577 dried, sprayed with gold particles and observed with a scanning electron microscope  
578 (S-3000N, Hitachi). Cells of the middle part of the lemma were observed for imaging  
579 and entire grain were imaged for cell number counting.

580

### 581 **Quantification of endogenous BR content**

---

582 Fresh leaves of two-month-old plants of *pow1* and WT were frozen in liquid nitrogen  
583 and then grounded to a fine powder. BR quantification was performed based on a  
584 previously described method (Xin et al., 2013).

585

### 586 **Map-based cloning**

587

588 The mapping population was constructed by crossing *pow1* with the *indica* cultivar  
589 Kasalath. Using 20 bulked WT and mutant plants, respectively, the candidate gene  
590 was first mapped to the short arm of chromosome 7 between the SSR markers  
591 RM8010 and RM1353. Further analysis of the F<sub>2</sub> mutant plants subsequently  
592 fine-mapped the casual gene to the region between RM21072 and RM21057, and  
593 sequence comparisons were then performed between *pow1* and WT for all annotated  
594 genes within this region.

595

### 596 **qRT-PCR assay**

597

598 Total RNA was extracted using the RNAios PLUS reagent (Takara), and 1 µg of RNA  
599 was reverse-transcribed by the oligo (dT) primer using a reverse transcription kit  
600 (Promega) after digestion with RNase-free DNaseI (Fermentas). The qRT-PCR assay  
601 was performed in triplicate with SYBR Green I Master reagent and the Light Cycler  
602 Nano system (Roche). *Actin* was used as the internal control for normalization. The  
603 primers used in this study are listed in Supplemental Table 1.

604

### 605 **Vector construction and plant transformation**

606

607 For the complementation test, a 4.6-kb genomic fragment that contained the entire  
608 wild type *POW1* genomic sequence, including the 2.2-kb native promoter, was cloned  
609 into the pZH2B vector. To create *D4*, *D11* and *TAF2* single RNAi plants, the hairpin  
610 sequence with two ~300-bp cDNA inverted repeats was inserted into pZH2Bi. For *D4*

---

611 and *D11* double RNAi construct, the cassette, including the ubiquitin promoter,  
612 hairpin sequence and Nos terminator, was cut from the *D4*-pZH2Bi construct and  
613 inserted into the *D11*-pZH2Bi construct. These vectors were transformed into WT or  
614 *pow1* with the *Agrobacterium tumefaciens*-mediated transformation method. The  
615 primers used for vector construction are listed in Supplemental Table 1.

616

### 617 **Transient expression assay in rice protoplast**

618

619 For subcellular localization, the full-length coding sequence of *POW1/OsBZR1* was  
620 cloned into the pSAT6-EYFP-N1 vector to form the *POW1/OsBZR1-EYFP* (*Enhanced*  
621 *yellow fluorescent protein*) construct. Empty vector was used as a negative control.  
622 For the BiFC assay, the coding sequences of *POW1*, *OsBZR1* and *TAF2-C* were PCR  
623 amplified, inserted into the pUC19-VYNE (R) or pUC19-VYCE (R) vector and fused  
624 with the N- or C-terminus of the Venus YFP sequence, respectively. These vectors and  
625 the corresponding empty vectors were cotransformed in different combinations into  
626 rice protoplast. The YFP signal was detected with a confocal laser scanning  
627 microscope (CLSM; FV1000, Olympus) after 16 h incubation at 28°C in the dark.

628 For the transactivation assay, the coding sequence of *POW1* was amplified and fused  
629 with GAL4 DNA binding domain in the pRT-BD vector, and the resulting construct  
630 was used as the effectors. The LUC vector, which contains the GAL4 binding motif  
631 and luciferase coding region, was used as the reporter, and the vector that expressed  
632 *Renilla* luciferase (pTRL) was employed as the internal control. The effector was then  
633 cotransformed into rice protoplast with the reporter and the internal control,  
634 respectively.

635

636 To detect the transactivation activity of TAF2 on cell division and expansion genes,  
637 the coding sequences of *TAF2* were PCR amplified and inserted into  
638 pSAT6-EYFP-N1, thus the TAF2-YFP was used as the effector. The 35S promoter in  
639 LUC was replaced by the promoters of cell division and expansion genes (~2.0-kb)

---

640 and the resulting constructs were used as reporters. The pTRL vector was then  
641 cotransformed with the resulting constructs into rice protoplast. The empty  
642 pSAT6-EYFP-N1 vector was also cotransformed as a negative control.

643

644 To detect the repressive effects of POW1 on TAF2, the coding sequences of *POW1*,  
645 *mPOW1* were PCR amplified and inserted into pSAT6-EYFP-N1, respectively. These  
646 two constructs were used as co-effectors with TAF2-YFP.

647

648 To detect OsBZR1-mediated inhibition on *D4* and *D11* expression, the promoters  
649 (~2.0-kb) of *D4* and *D11* were cloned into the LUC vector by replacing the *35S*  
650 promoter, respectively, and the resulting constructs were used as reporters. To create  
651 the effector construct, the coding sequence of *OsBZR1* was cloned into  
652 pSAT6-EYFP-N1 vector. To diminish the background difference, the empty  
653 pSAT6-EYFP-N1 vector was used as the negative control to cotransform with each  
654 reporter construct into the protoplast of *pow1* and WT, respectively. The pTRL vector  
655 was also cotransfected as an internal control.

656

657 After 16 h incubation at 28°C in the dark, the protoplast was centrifuged at 150 × *g*,  
658 and the pellet was used for the dual-luciferase assay as described in the  
659 Dual-Luciferase® Reporter Assay System Manual (Promega). All transformations  
660 were performed via the PEG (polyethylene glycol)/CaCl<sub>2</sub>-mediated method. The  
661 primers used for the transient assay are listed in Supplemental Table 1.

662

### 663 **Yeast two-hybrid assay**

664

665 The coding sequences of *POW1*, *TAF2*, *TAF2-C* and *OsBZR1* were cloned into the  
666 pGBKT7 or pGADT7 vector (Clontech), respectively, and the resulting constructs and  
667 the corresponding empty vectors were then transformed into the yeast strain Golden  
668 Yeast with different combinations. Interactions were detected on

---

669 SD/-Leu-Trp-His-Ade medium or SD/-Leu-Trp-His medium. The transformation was  
670 performed as described in the Clontech Yeast Two-Hybrid System User Manual. The  
671 primers used for the yeast two-hybrid assay are listed in Supplemental Table 1.

672

### 673 **Protein sequence alignment**

674

675 The amino acid sequence of POW1 was compared with the *Arabidopsis* homolog  
676 ALP1, the known DDE-domain containing transposonase Hs Harbi1 from human  
677 (*Homo sapiens*), and Dr Harbi1 and XP\_009300611.1 from zebrafish (*Danio rerio*).  
678 Alignment was performed using ClustalW. The sequences used for alignment were  
679 obtained by blasting with the POW1 protein sequence on the NCBI website  
680 (<https://blast.ncbi.nlm.nih.gov/Blast.cgi>).

681

### 682 **ChIP assay**

683

684 Formaldehyde cross-linked chromatin DNA was isolated from two weeks old leaves  
685 of WT and *pow1*. Immuno-precipitation was performed by anti-H3K27me<sup>3</sup> antibody  
686 (Millipore 07-449), then the H3K27me3 bounded DNA was isolated by protein A  
687 Dynabeads (Invitrogen, 10002D). The ChIP DNA was then used as a template for  
688 qRT-PCR assay. The input DNA before immunoprecipitation was used as control.  
689 Primers used are listed in Supplemental Table 1.

690

### 691 ***In vitro* and semi-*in vivo* pull down assay**

692

693 GST-tagged protein and bounded by Glutathione beads (GE healthcare).  
694 6×His-tagged protein were expressed and purified by Ni-NTA His Bind Resin  
695 (Millipore 70666-3). ~0.2 μg of GST-OsBZR1, GST-POW1 and GST-mPOW1



---

696 bounded to GST beads were incubated with ~0.3 µg TAF2-C-His at 4°C overnight,  
697 then the GST beads were collected by centrifugation and washed with 1×PBS for 5  
698 times. The output protein was detected using anti-His antibody (Abmart M20020). For  
699 the detection of interaction between GL7 and POW1/GSK2, ~0.2 µg of GST-POW1  
700 or GST-GSK2 bounded beads were made to pull down GL7-YFP expressed in rice  
701 protoplast. The GST beads were then washed with protein extraction buffer (50 mM  
702 sodium phosphate buffer, pH 7.4, 150mM NaCl, 10% glycerol, 0.1% NP-40, 1×  
703 protease inhibitor cocktail) for 3 times. The output protein was detected using  
704 anti-GFP antibody (Abcam ab290).

705

#### 706 **Phosphorylation analysis of OsBZR1 in plants.**

707

708 Flag leaves from two-month old plants were ground into powder in liquid and boiled  
709 with SDS-PAGE sample buffer. Protein samples were resolved by SDS-PAGE with  
710 or without 50 µM phos-tag (ApexBio F4002). OsBZR1 was detected by the  
711 commercial anti-OsBZR1 and anti-HSP was used as equal loading control (BPI,  
712 <http://www.proteomics.org.cn>).

713

#### 714 **Accession numbers**

715

716 Sequence data from this article could be found in the EMBL/GenBank data libraries  
717 under the following accession numbers: *POW1*, *Os07g07880*; *OsBZR1*, *Os07g39220*;  
718 *GSK2*, *Os05g11730*; *GL7*, *Os07g41200*; *IL11*, *Os04g54900*; *RAVL1*, *Os04g49230*; *D2*,  
719 *Os01g10040*; *D4*, *Os03g12660*; *D11*, *Os04g39430*; *BRD1*, *Os03g40540*; *OsBR11*,  
720 *Os01g52050* and *TAF2*, *Os09g24440*.

721

#### 722 **Supplemental data**

723

---

724 **Supplemental Figure 1.** Organ size comparison between *pow1* and WT. Scale bars, 2  
725 cm for (A), 5 cm for (B), 2 cm for (C), 2 mm for (D) and (E), and 500  $\mu\text{m}$  for (F),  
726 respectively.

727

728 **Supplemental Figure 2.** Comparison of the inner epidermal cells of the lemma  
729 between *pow1* and WT, which indicates the cells in *pow1* were longer and wider than  
730 those in WT. Scale bars, 50  $\mu\text{m}$ .

731

732 **Supplemental Figure 3.** Histological analysis of lamina joint of *pow1* and WT. (A)  
733 and (C) represent sections before the leaf angle forms, and (B) and (D) after the leaf  
734 angle forms. Red double-headed arrows in (A) and (B) indicate the adaxial cell of  
735 lamina joint. Scale bars, 100  $\mu\text{m}$ . The left section in (C) and (D) show the adaxial side  
736 of lamina joint.

737

738 **Supplemental Figure 4.** Protein sequence alignment of POW1, ALP1 and HARBI1  
739 proteins from human and zebrafish. Amino acids of ALP1 and POW1 are colored  
740 according to their properties. Black boxes indicate conserved DDE triads that are  
741 disrupted in both ALP1 and POW1.

742

743 **Supplemental Figure 5.** POW1 does not appear to function as an epigenetic regulator  
744 or a transcription factor.

745 (A) and (B) Transactivation activity assay. No significant transactivation activity was  
746 observed for POW1 in both yeast and rice protoplast.

747 (C) DNA methylation assay. No obvious difference of H3K27me3 levels within *D4*  
748 and *D11* gene locus was observed between *pow1* and WT. Data are means  $\pm$  SE ( $n =$   
749 3). *P* values from the student's *t*-test of *pow1* against WT were indicated.

750

751 **Supplemental Figure 6.** Downregulation of *D4* and *D11* shows little effects on grain  
752 size modification under the *pow1* mutant background.

---

753 (A) Expression analysis of *D4* and *D11* in the single and double RNAi transgenic  
754 plants. The transcript levels were normalized against WT, which was set to 1. Data are  
755 means  $\pm$  SE ( $n = 3$ ). Bars followed by the different letters represent significant  
756 difference at 5%..

757 (B) Grain length comparison among the *D4/D11* RNAi transgenic plants. Data are  
758 means  $\pm$  SE ( $n = 15$ ). Bars followed by the different letters represent significant  
759 difference at 5%.

760

761 **Supplemental Figure 7.** *pow1* shows enhanced BR signaling.

762 (A) Lamina joint assay. The second lamina joints of 7-day-old seedlings grown in the  
763 dark were excised and submerged in distilled water that contained different BL  
764 concentrations for 3 days. Data are means  $\pm$  SE ( $n = 20$ ). *P* values from the student's  
765 *t*-test of the *pow1* against WT were indicated.

766 (B) Coleoptile elongation assay. The coleoptile length of *pow1* and WT grown for 3  
767 days under different BL concentrations was compared. Data are means  $\pm$  SE ( $n = 10$ ).  
768 *P* values from the student's *t*-test of the *pow1* against WT were indicated.

769 (C) Expression analysis of the BR signaling genes *OsBZR1*, *RAV1*, *OsBR1* and *IL1*.  
770 The transcript levels were normalized against WT, which was set to 1. Data are means  
771  $\pm$  SE ( $n = 3$ ). *P* values from the student's *t*-test of the *pow1* against WT were  
772 indicated.

773

774 **Supplemental Figure 8.** Comparison of leaf angle and grain length among WT, *pow1*,  
775 *d61-1*, *d61-2*, and the double mutants. Data are means  $\pm$  SE ( $n = 20$ ). Bars followed  
776 by the different letters represent significant difference at 5%.

777

778 **Supplemental Figure 9.** Cytological observation. SEM observation and statistical  
779 analysis were conducted for the outer epidermal cells of grain husks from WT and  
780 *POW1*<sup>TAF2-RNAi</sup> plants ( $n = 20$  for cell size and 5 for cell number). *P* values from the  
781 student's *t*-test were indicated. Scale bars, 100  $\mu$ m.

---

782 **Supplemental Figure 10.** Sketch of the constructs used for luciferase assay.

783 (A) Constructs for detecting TAF2 transactivation activity on cell cycle and expansion  
784 genes.

785 (B) Constructs for detecting the effect of POW1/mPOW1 on the transactivation  
786 activity of TAF2 on cell cycle and expansion genes.

787 (C) Constructs for detecting the inhibitive activity of OsBZR1 on *D4* and *D11*  
788 expression.

789

790 **Supplemental Figure 11.** Histological analysis of lamina joint. (C), (D), (G), and (H)  
791 indicate the adaxial side of lamina joint. Scale bars, 50  $\mu$ m.

792

793 **Supplemental Figure 12.** Interaction assay of POW1-OsBZR1 and TAF2-OsBZR1.

794 No direct interaction was detected between POW1/TAF2-C and OsBZR1 in both  
795 yeast (A) and rice protoplast (B).

796

797 **Supplemental Table 1.** Primers used in this study.

798

## 799 **ACKNOWLEDGEMENTS**

800

801 This work was supported by grants from the National Key Research and Development  
802 Program of China (Grant: 2016YFD0101801) and the State Key Laboratory of Plant  
803 Genomics (SKLPG2011B0403). S.F. and J.C. are supported by the National Natural  
804 Science Foundation of China (3147043). We thank Professor Hongning Tong  
805 (Chinese Academy of Agricultural Sciences) for suggestions regarding exogenous  
806 BRZ treatments. The *d61* mutants were kindly provided by Professor Chengcai Chu,  
807 and the pRT-BD, pTRL and LUC vectors were provided by Professor Shouyi Chen  
808 (Institute of Genetics and Developmental Biology, Chinese Academy of Sciences).

809

## 810 **AUTHOR CONTRIBUTIONS**

811

---

812 S.Y. conceived and supervised the project. S.Y. and L.Z. designed the study and  
813 analyzed the data. L.Z. performed the functional analyses. R.W. screened the *pow1*  
814 mutants, created mapping population and double mutants, and carried out field  
815 management. Y.W. contributed the reagents and equipment management. S.F. and J.C.  
816 performed the BR quantification. Y.X. and L.Z. prepared the photos. S.Y. and L.Z.  
817 wrote the manuscript. All authors have read and approved the final manuscript.

818

## 819 REFERENCES

820

821 **Asahara, H., Santoso, B., Guzman, E., Du, K., Cole, P.A., Davidson, I., and**  
822 **Montminy, M.** (2001). Chromatin-dependent cooperativity between constitutive  
823 and inducible activation domains in CREB. *Mol. Cell. Biol.* **21**, 7892-7900.

824 **Asami, T., Mizutani, M., Fujioka, S., Goda, H., Min, Y.K., Shimada, Y., Nakano,**  
825 **T., Takatsuto, S., Matsuyama, T., Nagata, N., Sakata, K., and Yoshida, S.**  
826 (2001). Selective interaction of triazole derivatives with DWF4, a cytochrome P450  
827 monooxygenase of the brassinosteroid biosynthetic pathway, correlates with  
828 brassinosteroid deficiency in *Planta*. *J. Biol. Chem.* **276**, 25687-25691.

829 **Bahat, A., Kedmi, R., Gazit, K., Richardo-Lax, I., Ainbinder, E., and Dikstein, R.**  
830 (2013). TAF4b and TAF4 differentially regulate mouse embryonic stem cells  
831 maintenance and proliferation. *Genes Cells* **18**, 225-237.

832 **Bai, M.Y., Zhang, L.Y., Gampala, S.S., Zhu, S.W., Song, W.Y., Chong, K., and**  
833 **Wang, Z.Y.** (2007). Functions of OsBZR1 and 14-3-3 proteins in brassinosteroid  
834 signaling in rice. *Proc. Natl. Acad. Sci. USA* **104**, 13839-13844.

835 **Bertrand, C., Benhamed, M., Li, Y.F., Ayadi, M., Lemonnier, G., Renou, J.P.,**  
836 **Delarue, M., and Zhou, D.X.** (2005). Arabidopsis HAF2 gene encoding  
837 TATA-binding protein (TBP)-associated factor TAF1, is required to integrate light  
838 signals to regulate gene expression and growth. *J. Biol. Chem.* **280**, 1465-1473.

839 **Cao, H., and Chen, S.** (1995). Brassinosteroid-induced rice lamina joint inclination  
840 and its relation to indole-3-acetic acid and ethylene. *Plant Growth Regul.* **16**,  
841 189-196.

842 **Chen, Z., and Manley, J.L.** (2000). Robust mRNA transcription in chicken DT40  
843 cells depleted of TAFII31 suggests both functional degeneracy and evolutionary  
844 divergence. *Mol. Cell. Biol.* **20**, 5064-5076.

845 **Duan, Y., Li, S., Chen, Z., Zheng, L., Diao, Z., Zhou, Y., Lan, T., Guan, H., Pan,**  
846 **R., Xue, Y., and Wu, W.** (2012). *Dwarf and deformed flower 1*, encoding an F-box

- 
- 847 protein, is critical for vegetative and floral development in rice (*Oryza sativa* L.).  
848 Plant J. **72**, 829-842.
- 849 **Eom, H., Park, S.J., Kim, M.K., Kim, H., Kang, H., and Lee, I.** (2018). TAF15b,  
850 involved in the autonomous pathway for flowering, represses transcription of  
851 FLOWERING LOCUS C. Plant J. **93**, 79-91.
- 852 **Garbett, K.A., Tripathi, M.K., Cencki, B., Layer, J.H., and Weil, P.A.** (2007).  
853 Yeast TFIID serves as a coactivator for Rap1p by direct protein-protein interaction.  
854 Mol. Cell. Biol. **27**, 297-311.
- 855 **Gupta, K., Sari-Ak, D., Haffke, M., Trowitzsch, S., and Berger, I.** (2016).  
856 Zooming in on transcription preinitiation. J. Mol. Biol. **428**, 2581-2591.
- 857 **Hong, Z., Ueguchi Tanaka, M., Umemura, K., Uozu, S., Fujioka, S., Takatsuto, S.,**  
858 **Yoshida, S., Ashikari, M., Kitano, H., and Matsuoka, M.** (2003). A rice  
859 brassinosteroid-deficient mutant, *ebisu dwarf* (*d2*), is caused by a loss of function  
860 of a new member of cytochrome P450. Plant Cell **15**, 2900-2910.
- 861 **Jacobson, R.H., Ladurner, A.G., King, D.S., and Tjian, R.** (2000). Structure and  
862 function of a Human TAFII 250 double bromodomain module. Science (New  
863 York, N.Y.) **288**, 1422-1425.
- 864 **Jiang, P., Wang, S., Zheng, H., Li, H., Zhang, F., Su, Y., Xu, Z., Lin, H., Qian, Q.,**  
865 **and Ding, Y.** (2018). SIP1 participates in regulation of flowering time in rice by  
866 recruiting OsTrx1 to *Ehd1*. New Phytol. **219**, 422-435.
- 867 **Jiang, Y., Bao, L., Jeong, S.Y., Kim, S.K., Xu, C., Li, X., and Zhang, Q.** (2012).  
868 XIAO is involved in the control of organ size by contributing to the regulation of  
869 signaling and homeostasis of brassinosteroids and cell cycling in rice. Plant J. **70**,  
870 398-408.
- 871 **Kapitonov, V.V., and Jurka, J.** (1999). Molecular paleontology of transposable  
872 elements from *Arabidopsis thaliana*. Genetica **107**, 27-37.
- 873 **Kapitonov, V.V., and Jurka, J.** (2004). Harbinger transposons and an ancient  
874 HARBI1 gene derived from a transposase. DNA Cell Biol. **23**, 311-324.
- 875 **Kim, B.K., Fujioka, S., Takatsuto, S., Tsujimoto, M., and Choe, S.** (2008).  
876 Castasterone is a likely end product of brassinosteroid biosynthetic pathway in rice.  
877 Biochem. Biophys. Res. Commun. **374**, 614-619.
- 878 **Lago, C., Clerici, E., Mizzi, L., Colombo, L., and Kater, M.M.** (2004).  
879 TBP-associated factors in Arabidopsis. Gene **342**, 231-241.
- 880 **Lago, C., Clerici, E., Dreni, L., Horlow, C., Caporali, E., Colombo, L., and Kater,**  
881 **M.M.** (2005). The Arabidopsis TFIID factor AtTAF6 controls pollen tube growth.  
882 Dev. Biol. **285**, 91-100.

- 
- 883 **Li, N., Xu, R., Duan, P., and Li, Y.** (2018). Control of grain size in rice. In *Plant*  
884 *Reproduction*, pp. 1-15.
- 885 **Liang, S.C., Hartwig, B., Perera, P., Mora-García, S., de Leau, E., Thornton, H.,**  
886 **de Alves, F.L., Rapsilber, J., Yang, S., James, G.V., Schneeberger, K., Finnegan,**  
887 **E.J., Turck, F., and Goodrich, J.** (2015). Kicking against the PRCs – A  
888 domesticated transposase antagonises silencing mediated by Polycomb Group  
889 Proteins and is an accessory component of polycomb repressive complex 2. *PLoS*  
890 *Genet.* **11**, e1005660.
- 891 **Lindner, M., Simonini, S., Kooiker, M., Gagliardini, V., Somssich, M., Hohenstatt,**  
892 **M., Simon, R., Grossniklaus, U., and Kater, M.M.** (2013). TAF13 interacts with  
893 PRC2 members and is essential for Arabidopsis seed development. *Dev. Biol.* **379**,  
894 28-37.
- 895 **Liu, J., Chen, J., Zheng, X., Wu, F., Lin, Q., Heng, Y., Tian, P., Cheng, Z., Yu, X.,**  
896 **Zhou, K., Zhang, X., Guo, X., Wang, J., Wang, H., and Wan, J.** (2017). *GW5*  
897 acts in the brassinosteroid signalling pathway to regulate grain width and weight in  
898 rice. *Nat. Plants* **3**.
- 899 **Metzger, D., Scheer, E., Soldatov, A., and Tora, L.** (1999). Mammalian TAFII30 is  
900 required for cell cycle progression and specific cellular differentiation programmes.  
901 *EMBO J.* **18**, 4823-4834.
- 902 **Mori, M., Nomura, T., Ooka, H., Ishizaka, M., Yokota, T., Sugimoto, K., Okabe,**  
903 **K., Kajiwara, H., Satoh, K., Yamamoto, K., Hirochika, H., and Kikuchi, S.**  
904 (2002). Isolation and characterization of a rice dwarf mutant with a defect in  
905 brassinosteroid biosynthesis. *Plant Physiol.* **130**, 1152-1161.
- 906 **Morinaka, Y., Sakamoto, T., Inukai, Y., Agetsuma, M., Kitano, H., Ashikari, M.,**  
907 **and Matsuoka, M.** (2006). Morphological alteration caused by brassinosteroid  
908 insensitivity increases the biomass and grain production of rice. *Plant Physiol.* **141**,  
909 924-931.
- 910 **Ning, J., Zhang, B., Wang, N., Zhou, Y., and Xiong, L.** (2011). Increased Leaf  
911 Angle1, a Raf-Like MAPKKK that interacts with a nuclear protein family, regulates  
912 mechanical tissue formation in the lamina joint of rice. *Plant Cell* **23**, 4334-4347.
- 913 **Nogales, E., Louder, R.K., and He, Y.** (2017). Structural insights into the eukaryotic  
914 transcription initiation machinery. *Annu. Rev. Biophys.* **46**, 59-83.
- 915 **Qiao, S.L., Sun, S.Y., Wang, L.L., Wu, Z.H., Li, C.X., Li, X.M., Wang, T., Leng,**  
916 **L.N., Tian, W.S., Lu, T.G., and Wang, X.L.** (2017). The RLA1/SMOS1  
917 transcription factor functions with OsBZR1 to regulate brassinosteroid signaling  
918 and rice architecture. *Plant Cell* **29**, 292-309.
- 919 **Reeves, W.M., and Hahn, S.** (2005). Targets of the Gal4 transcription activator in  
920 functional transcription complexes. *Mol. Cell. Biol.* **25**, 9092-9102.

- 
- 921 **Rojo Niersbach, E., Furukawa, T., and Tanese, N.** (1999). Genetic dissection of  
922 hTAFIII130 defines a hydrophobic surface required for interaction with  
923 glutamine-rich activators. *J. Biol. Chem.* **274**, 33778-33784.
- 924 **Sakamoto, T., Morinaka, Y., Ohnishi, T., Sunohara, H., Fujioka, S., Ueguchi**  
925 **Tanaka, M., Mizutani, M., Sakata, K., Takatsuto, S., Yoshida, S., Tanaka, H.,**  
926 **Kitano, H., and Matsuoka, M.** (2006). Erect leaves caused by brassinosteroid  
927 deficiency increase biomass production and grain yield in rice. *Nat. Biotech.* **24**,  
928 105-109.
- 929 **Sekiguchi, T., Nohiro, Y., Nakamura, Y., Hisamoto, N., and Nishimoto, T.** (1991).  
930 The human CCG1 gene, essential for progression of the G1 phase, encodes a  
931 210-kilodalton nuclear DNA-binding protein. *Mol. Cell. Biol.* **11**, 3317-3325.
- 932 **Shi, Z., Wang, J., Wan, X., Shen, G., Wang, X., and Zhang, J.** (2007).  
933 Over-expression of rice *OsAGO7* gene induces upward curling of the leaf blade that  
934 enhanced erect-leaf habit. *Planta* **226**, 99-108.
- 935 **Shimada, A., Ueguchi-Tanaka, M., Sakamoto, T., Fujioka, S., Takatsuto, S.,**  
936 **Yoshida, S., Sazuka, T., Ashikari, M., and Matsuoka, M.** (2006). The rice  
937 SPINDLY gene functions as a negative regulator of gibberellin signaling by  
938 controlling the suppressive function of the DELLA protein, SLR1, and modulating  
939 brassinosteroid synthesis. *Plant J.* **48**, 390-402.
- 940 **Sridhar, V.V., Surendrarao, A., and Liu, Z.** (2006). *APETALA1* and *SEPALLATA3*  
941 interact with *SEUSS* to mediate transcription repression during flower development  
942 *Development* **133**, 3159-3166.
- 943 **Tamada, Y., Nakamori, K., Nakatani, H., Matsuda, K., Hata, S., Furumoto, T.,**  
944 **and Izui, K.** (2007). Temporary expression of the *TAF10* gene and its requirement  
945 for normal development of *Arabidopsis thaliana*. *Plant Cell Physiol.* **48**, 134-146.
- 946 **Tanabe, S., Ashikari, M., Fujioka, S., Takatsuto, S., Yoshida, S., Yano, M.,**  
947 **Yoshimura, A., Kitano, H., Matsuoka, M., Fujisawa, Y., Kato, H., and Iwasaki,**  
948 **Y.** (2005). A novel cytochrome P450 is implicated in brassinosteroid biosynthesis  
949 via the characterization of a rice dwarf mutant, *dwarf11*, with reduced seed length.  
950 *Plant Cell* **17**, 776-790.
- 951 **Tian, J., Wang, C., Xia, J., Wu, L., Xu, G., Wu, W., Li, D., Qin, W., Han, X., Chen,**  
952 **Q., Jin, W., and Tian, F.** (2019). Teosinte ligule allele narrows plant architecture  
953 and enhances high-density maize yields. *Science (New York, N.Y.)* **365**, 658-664.
- 954 **Tong, H., and Chu, C.** (2018). Functional specificities of brassinosteroid and  
955 potential utilization for crop improvement. *Trends Plant Sci.* **23**, 1016-1028.
- 956 **Tong, H., Liu, L., Jin, Y., Du, L., Yin, Y., Qian, Q., Zhu, L., and Chu, C.** (2012).  
957 DWARF AND LOW-TILLERING acts as a direct downstream target of a  
958 GSK3/SHAGGY-Like kinase to mediate brassinosteroid responses in rice. *Plant*  
959 *Cell* **24**, 2562-2577.



- 960 **Tong, H., Jin, Y., Liu, W., Li, F., Fang, J., Yin, Y., Qian, Q., Zhu, L., and Chu, C.**  
961 (2009). DWARF AND LOW-TILLERING, a new member of the GRAS family,  
962 plays positive roles in brassinosteroid signaling in rice. *Plant J.* **58**, 803-816.
- 963 **Tong, H., Xiao, Y., Liu, D., Gao, S., Liu, L., Yin, Y., Jin, Y., Qian, Q., and Chu, C.**  
964 (2014). Brassinosteroid regulates cell elongation by modulating gibberellin  
965 metabolism in rice. *Plant Cell* **26**, 4376-4393.
- 966 **Wang, S.K., Li, S., Liu, Q., Wu, K., Zhang, J.Q., Wang, S.S., Wang, Y., Chen,**  
967 **X.B., Zhang, Y., Gao, C.X., Wang, F., Huang, H.X., and Fu, X.D.** (2015a). The  
968 *OsSPL16-GW7* regulatory module determines grain shape and simultaneously  
969 improves rice yield and grain quality. *Nat. Genet.* **47**, 949-954.
- 970 **Wang, Y., Xiong, G., Hu, J., Jiang, L., Yu, H., Xu, J., Fang, Y., Zeng, L., Xu, E.,**  
971 **Xu, J., Ye, W., Meng, X., Liu, R., Chen, H., Jing, Y., Wang, Y., Zhu, X., Li, J.,**  
972 **and Qian, Q.** (2015b). Copy number variation at the *GL7* locus contributes to grain  
973 size diversity in rice. *Nat. Genet.* **47**, 944.
- 974 **Wang, Z.Y., Bai, M.Y., Oh, E., and Zhu, J.Y.** (2012). Brassinosteroid signaling  
975 network and regulation of photomorphogenesis. *Annu. Rev. Genet.* **46**, 701-724.
- 976 **Waterworth, W.M., Drury, G.E., Hunter, G.B., and West, C.E.** (2015). Arabidopsis  
977 TAF1 is an MRE11-interacting protein required for resistance to genotoxic stress  
978 and viability of the male gametophyte. *Plant J.* **84**, 545-557.
- 979 **Weake, V.M., and Workman, J.L.** (2010). Inducible gene expression: diverse  
980 regulatory mechanisms. *Nat. Rev. Genet.* **11**, 426-437.
- 981 **Wu, C.Y., Trieu, A., Radhakrishnan, P., Kwok, S.F., Harris, S., Zhang, K., Wang,**  
982 **J.L., Wan, J.M., Zhai, H.Q., Takatsuto, S., Matsumoto, S., Fujioka, S.,**  
983 **Feldmann, K.A., and Pennell, R.I.** (2008). Brassinosteroids regulate grain filling  
984 in rice. *Plant Cell* **20**, 2130-2145.
- 985 **Xin, P., Yan, J., Fan, J., Chu, J., and Yan, C.** (2013). An improved simplified  
986 high-sensitivity quantification method for determining brassinosteroids in different  
987 tissues of rice and Arabidopsis. *Plant Physiol.* **162**, 2056-2066.
- 988 **Yamamuro, C., Ihara, Y., Wu, X., Noguchi, T., Fujioka, S., Takatsuto, S.,**  
989 **Ashikari, M., Kitano, H., and Matsuoka, M.** (2000). Loss of function of a rice  
990 *brassinosteroid insensitive 1* homolog prevents internode elongation and bending of  
991 the lamina joint. *Plant Cell* **12**, 1591-1605.
- 992 **Yuan, Y.W., and Wessler, S.R.** (2011). The catalytic domain of all eukaryotic  
993 cut-and-paste transposase superfamilies. *Proc. Natl. Acad. Sci. USA* **108**,  
994 7884-7889.
- 995 **Zhu, X., Liang, W., Cui, X., Chen, M., Yin, C., Luo, Z., Zhu, J., Lucas, W.J.,**  
996 **Wang, Z., and Zhang, D.** (2015). Brassinosteroids promote development of rice

997 pollen grains and seeds by triggering expression of Carbon Starved Anther, a MYB  
998 domain protein. *Plant J.* **82**, 570-581.

999 **Zuo, J., and Li, J.** (2014). Molecular genetic dissection of quantitative trait loci  
1000 regulating rice grain size. *Annu. Rev. Genet.* **48**, 99-118.

1001

## 1002 **FIGURE LEGENDS**

1003

1004 **Figure 1.** Phenotypic analysis of the *pow1* mutant.

1005 (A) to (C) Grain size comparison. Scale bars, 5 mm.

1006 (D) Statistical analysis of grain size. Data are means  $\pm$  SE ( $n = 30$ ). *P* values from the  
1007 student's *t*-test of *pow1* against WT were indicated.

1008 (E) Population morphology of *pow1* and WT. Indicating the randomly extended  
1009 leaves in the mutant.

1010 (F) Comparison of leaf angle of the main panicle between *pow1* and WT. Scale bar, 3  
1011 cm.

1012

1013 **Figure 2.** Mutation of *POW1* enhances cell division and cell expansion.

1014 (A) SEM observation of the outer epidermal cells in the lemma of *pow1* and WT.  
1015 Scale bars, 50  $\mu$ m.

1016 (B) and (C) Statistical analysis of length and width of the epidermal cells shown in  
1017 (A). Data are means  $\pm$  SE ( $n = 100$ ). *P* values from the student's *t*-test of *pow1* against  
1018 WT were indicated.

1019 (D) and (E) Expression analysis of cell division and cell expansion related genes in 2  
1020 mm inflorescences and lamina joints of *pow1* and WT. The transcript levels were  
1021 normalized against WT, which was set to 1. Data are means  $\pm$  SE ( $n = 3$ ). *P* values  
1022 from the student's *t*-test of *pow1* against WT were indicated.

1023

1024 **Figure 3.** Map-based cloning of *POW1*.

1025 (A) Identification of the *POW1* candidate. *POW1* is located between RM21072 and  
1026 RM21057 on chromosome 7. Sequence comparison found one mutation from G to T

---

1027 occurred in the mutant, which results in an amino acid change from Arg to Ser.  
1028 **(B)** and **(C)** Phenotypes of whole plants and grains of *pow1*, WT and complemented  
1029 T<sub>0</sub> line (*pow1-C*). Scale bars, 20 cm for **(B)** and 5 mm for **(C)**.  
1030 **(D)** Expression analysis of *POW1* in various plant tissues. Data are means  $\pm$  SE ( $n =$   
1031 3).  
1032 **(E)** Protein structure of POW1.  
1033 **(F)** Subcellular localization of POW1. POW1 is localized in the nucleus in most cells.  
1034 For a small portion of cells ( $\approx 10\%$ ), however, POW1-YFP is observed in cytoplasm  
1035 and membrane, as well as in nucleus. Scale bars, 10  $\mu$ m.

1036

1037 **Figure 4.** *pow1* is a BR-overproducing mutant.

1038 **(A)** Endogenous BR quantification. Two-month-old field grown plants were sampled.  
1039 Data are means  $\pm$  SE ( $n = 3$ ). *P* values from the student's *t*-test of *pow1* against WT  
1040 were indicated.

1041 **(B)** Expression analysis of BR biosynthesis genes in 2 mm inflorescences for *D11* and  
1042 flag leaves for *D4*. The transcript levels were normalized against WT, which was set  
1043 to 1. Data are means  $\pm$  SE ( $n = 3$ ). *P* values from the student's *t*-test of *pow1* against  
1044 WT were indicated.

1045 **(C)** BRZ treatment. The sterilized seeds were sowed on half strength MS medium that  
1046 contained different concentrations of BRZ and cultured for one week after  
1047 germination. The white arrows indicate the second lamina joints. Scale bar, 1 cm.

1048 **(D)** and **(E)** Comparison of leaf angle and grain size among the *D4* and *D11* RNAi  
1049 transgenic lines under the background of *pow1* and WT. Scale bars, 20 cm for **(D)** and  
1050 5 mm for **(E)**.

1051

1052 **Figure 5.** *pow1* is a BR-signaling mutant.

1053 **(A)** Lamina joint assay. The second leaf laminas of 7-day-old dark grown seedlings  
1054 were excised and submerged in distilled water of different BL concentrations for 3  
1055 days. Scale bar, 1 cm.

---

1056 **(B)** Coleoptile elongation assay. The coleoptile length of *pow1* and WT grown for 3  
1057 days under different BL concentrations was compared. Scale bar, 1 cm.

1058 **(C) to (F)** Comparison of leaf angle and grain size between *pow1* and *d61/pow1*  
1059 double mutants. Two allelic mutants of *d61-1* and *d61-2* were used for analysis. Scale  
1060 bars, 20 cm for **(C)** and **(D)**, and 5 mm for **(E)** and **(F)**.

1061

1062 **Figure 6.** Transactivation assay of TAF2 and its interaction with POW1.

1063 **(A) to (C)** Interaction assay between POW1/mPOW1 and TAF2. GST-OsBZR1 was  
1064 used as negative control. Scale bars, 10  $\mu$ m.

1065 **(D)** Expression analysis of *TAF2* in the lamina joint and young panicle of *pow1* and  
1066 WT. The transcript levels were normalized against WT, which was set to 1. Data are  
1067 means  $\pm$  SE ( $n = 3$ ). *P* values from the student's *t*-test of *pow1* against WT were  
1068 indicated.

1069

1070 **Figure 7.** *TAF2* is a positive regulator for grain size.

1071 **(A) to (C)** Phenotypes of plants, leaf angle, and grain size in the *TAF2*-RNAi  
1072 transgenic lines. Scale bars, 20 cm for **(A)** and 5 mm for **(C)**.

1073 **(D)** Expression analysis of cell division and cell expansion related genes in the  
1074 *TAF2*-RNAi transgenic line. The transcript levels were normalized against WT, which  
1075 was set to 1. Data are means  $\pm$  SE ( $n = 3$ ). *P* values from the student's *t*-test of the  
1076 *TAF2*-RNAi transgenic line against WT were indicated.

1077 **(E)** *TAF2* could effectively activate the transcription of cell division and cell  
1078 expansion genes. Data are means  $\pm$  SE ( $n = 3$ ). *P* values calculated from the student's  
1079 *t*-test were indicated.

1080 **(F)** Activation of *TAF2* on the transcription of cell division and cell expansion genes  
1081 were differentially affected by POW1 and mPOW1. Data are means  $\pm$  SE ( $n = 3$ ). *P*  
1082 values from the student's *t*-test of POW1 against mPOW1 were indicated.

1083

1084 **Figure 8.** Downregulation of *TAF2* could rescue the grain size of *pow1*.

---

1085 (A) to (C) Phenotypes of plants, grain size, and leaf angle in the *TAF2*-RNAi  
1086 transgenic lines under the *pow1* mutant background. Scale bars, 20 cm for (A) and 5  
1087 mm for (B).

1088 (D) and (E) Expression analysis of *TAF2*, *D4* and *D11* in the RNAi transgenic lines  
1089 under the background of *pow1* and WT. The transcript levels were normalized against  
1090 WT, which was set to 1. Data are means  $\pm$  SE ( $n = 3$ ). Bars followed by the different  
1091 letters represent significant difference at 5%.

1092 (F) Statistical analysis of grain length and grain width in the RNAi transgenic lines  
1093 under the background of *pow1* and WT. Data are means  $\pm$  SE ( $n = 15$ ). Bars followed  
1094 by the different letters represent significant difference at 5%.

1095

1096 **Figure 9.** *POW1* affects BR homeostasis by altering OsBZR1 subcellular localization.

1097 (A) and (B) Protein localization. OsBZR1-YFP localizes mostly in the nuclear of WT  
1098 protoplast (A), while the signals were mostly observed in the cytoplasm of *pow1*  
1099 protoplast (B). Scale bars, 200  $\mu$ m.

1100 (C) Phosphorylation assay. Indicating that *pow1* possesses more phosphorylated  
1101 OsBZR1.

1102 (D) Transactivation activity assay. Indicating that the mutation of *POW1* reduces the  
1103 inhibition of OsBZR1 on *D4* and *D11* expression.

1104 (E) Comparison of *POW1* expression between *pow1* and WT. The transcript levels  
1105 were normalized against WT, which was set to 1.

1106 (F) BR induction assay. The whole shoots of two-week-old seedlings under 1  $\mu$ M BL  
1107 were collected after 0, 2, 6, 12, and 24 h treatment. Data in (D)-(F) are means  $\pm$  SE ( $n$   
1108 = 3), and *P* values from the student's *t*-test were indicated.

1109

1110 **Figure 10.** GL7 might be a linker between POW1 and BR pathway.

1111 (A) Interaction assay. GL7 could interact with POW1 and GSK2 but not OsBZR1 in  
1112 yeast.

1113 (B) Semi-pull down assay. Indicating the interaction between GL7 and POW1/GSK2.

1114 GST-OsBZR1 was used as the negative control.

1115

1116 **Figure 11.** The putative working model of *POW1* in separable regulation of grain size  
1117 and leaf angle development. *POW1* is a key factor in the BR pathway by affecting  
1118 OsBZR1 phosphorylation, and participates in *TAF2*-mediated cell cycle progression  
1119 through inhibiting *TAF2* transactivation activity. In the lamina joint, the little effect of  
1120 *TAF2* on cell elongation leads to the dominant role of BR in leaf angle formation.  
1121 While in the young panicle, the marked role of *TAF2* in cell division and cell  
1122 elongation gives rise to the *TAF2*-dominated grain size development. The red question  
1123 mark indicates that it is not clear whether *GL7* is the direct linker between *POW1* and  
1124 *GSK2* to regulate the phosphorylation of OsBZR1.

1125

1126

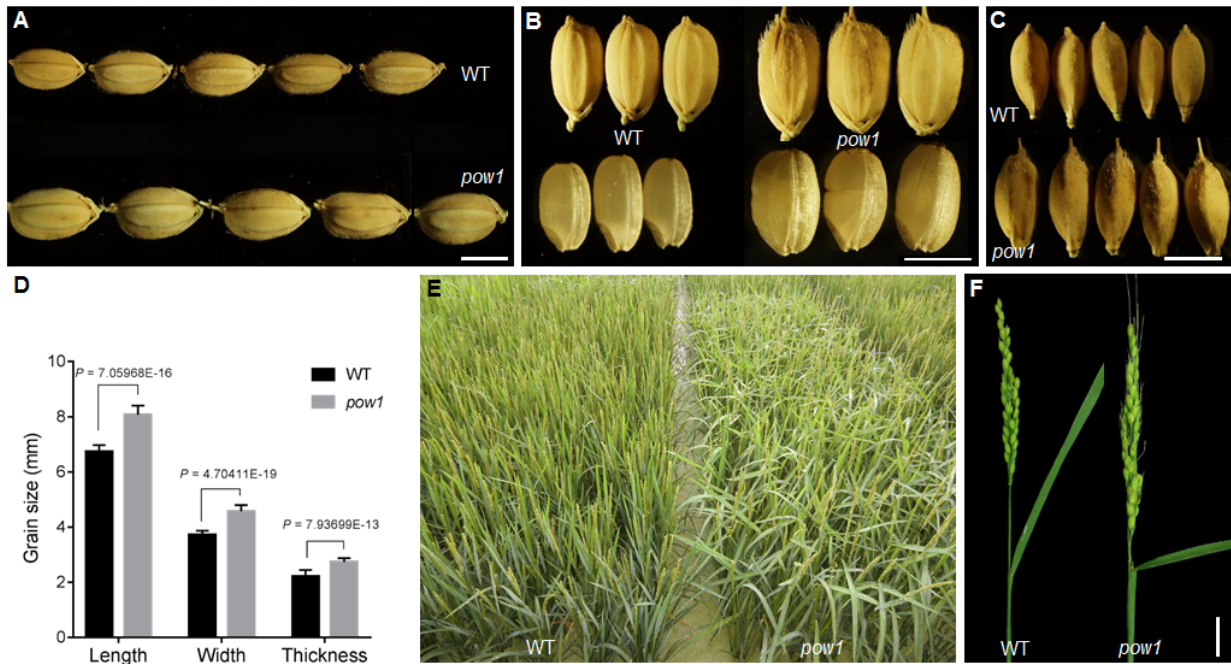

**Figure 1.** Phenotypic analysis of the *pow1* mutant.

(A) to (C) Grain size comparison. Scale bars, 5 mm.

(D) Statistical analysis of grain size. Data are means  $\pm$  SE ( $n = 30$ ).  $P$  values from the student's  $t$ -test of *pow1* against WT were indicated.

(E) Population morphology of *pow1* and WT. Indicating the randomly extended leaves in the mutant.

(F) Comparison of leaf angle of the main panicle between *pow1* and WT. Scale bar, 3 cm.

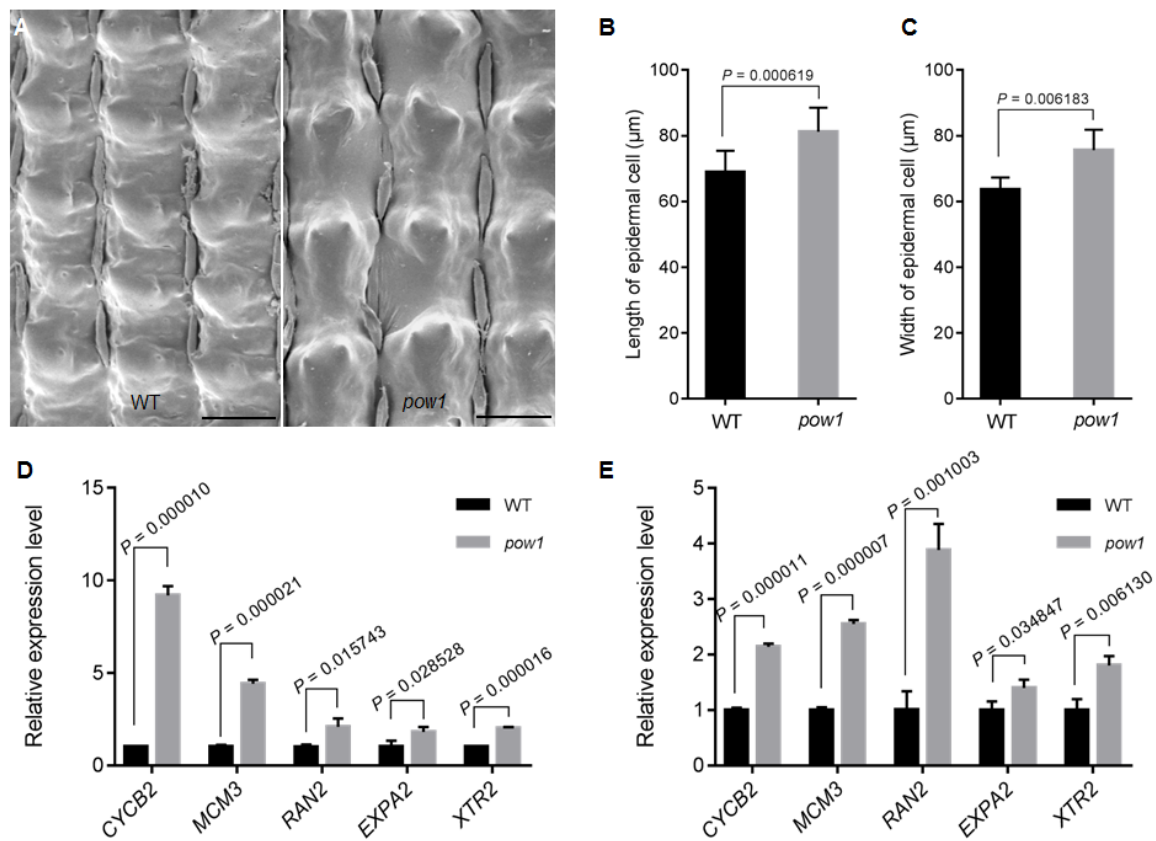

**Figure 2.** Mutation of *POW1* enhances cell division and cell expansion.

(A) SEM observation of the outer epidermal cells in the lemma of *pow1* and WT. Scale bars, 50 μm.

(B) and (C) Statistical analysis of length and width of the epidermal cells shown in (A). Data are means ± SE ( $n = 100$ ).  $P$  values from the student's  $t$ -test of *pow1* against WT were indicated.

(D) and (E) Expression analysis of cell division and cell expansion related genes in 2 mm inflorescences and lamina joints of *pow1* and WT. The transcript levels were normalized against WT, which was set to 1. Data are means ± SE ( $n = 3$ ).  $P$  values from the student's  $t$ -test of *pow1* against WT were indicated.



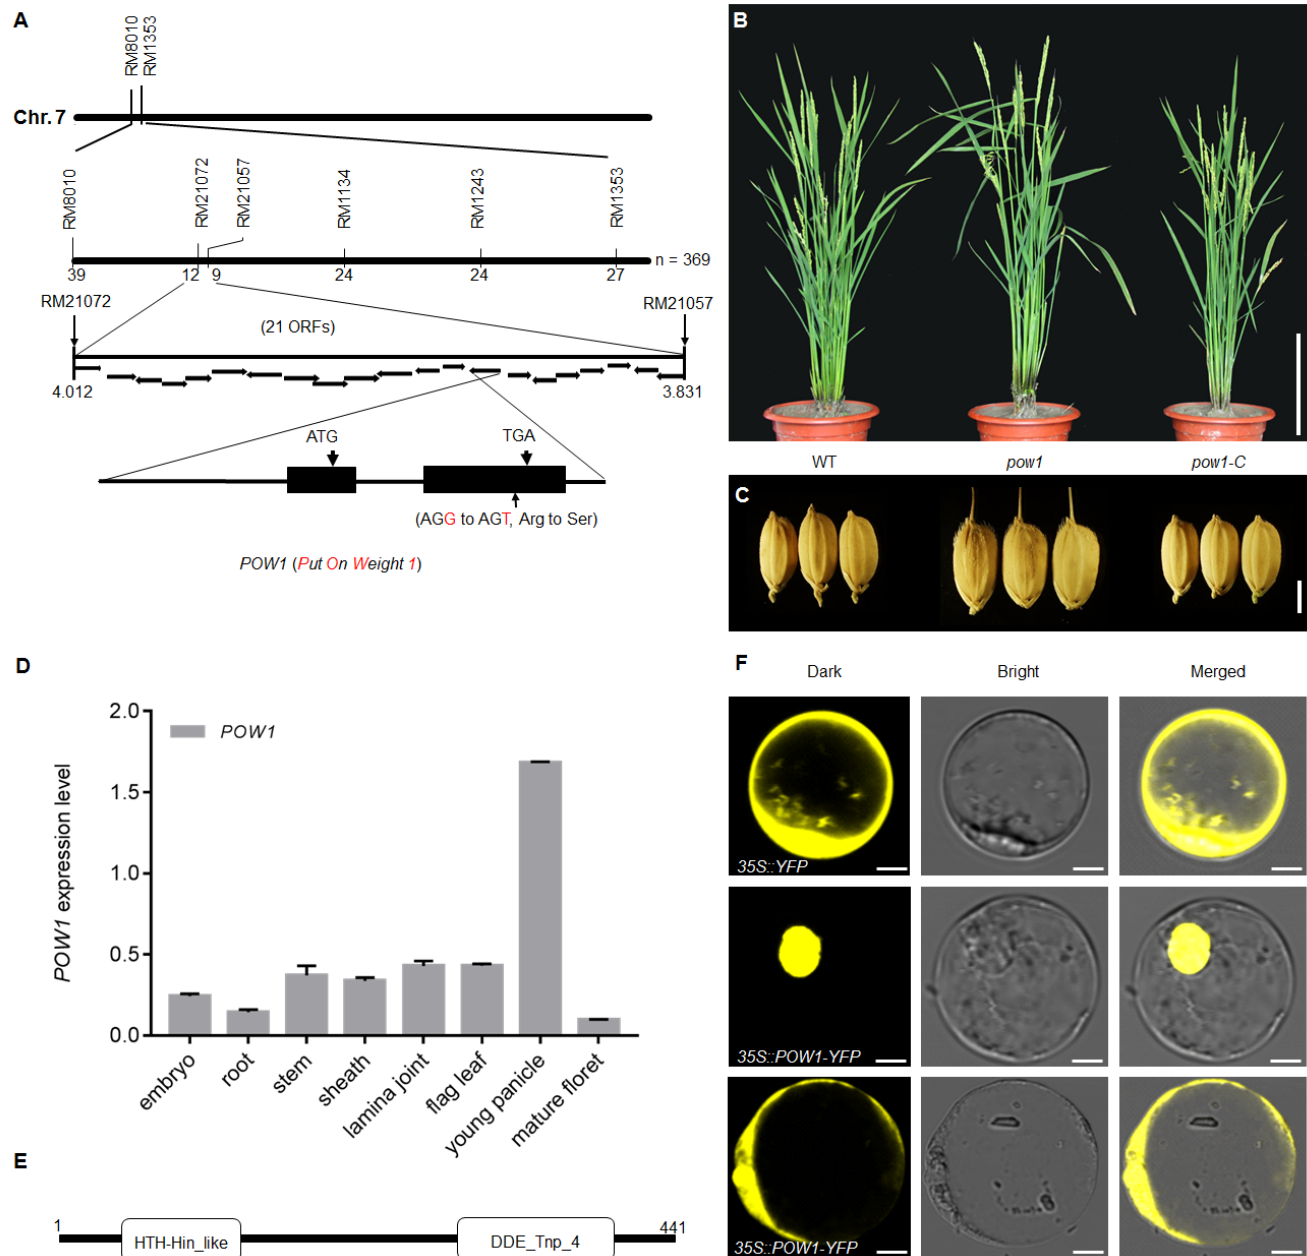

**Figure 3.** Map-based cloning of *POW1*.

(A) Identification of the *POW1* candidate. *POW1* is located between RM21072 and RM21057 on chromosome 7. Sequence comparison found one mutation from G to T occurred in the mutant, which results in an amino acid change from Arg to Ser.

(B) and (C) Phenotypes of whole plants and grains of *pow1*, WT and complemented  $T_0$  line (*pow1-C*). Scale bars, 20 cm for (B) and 5 mm for (C).

(D) Expression analysis of *POW1* in various plant tissues. Data are means  $\pm$  SE ( $n = 3$ ).

**(E)** Protein structure of POW1.

**(F)** Subcellular localization of POW1. POW1 is localized in the nucleus in most cells.

For a small portion of cells ( $\approx 10\%$ ), however, POW1-YFP is observed in cytoplasm and membrane, as well as in nucleus. Scale bars, 10  $\mu\text{m}$ .

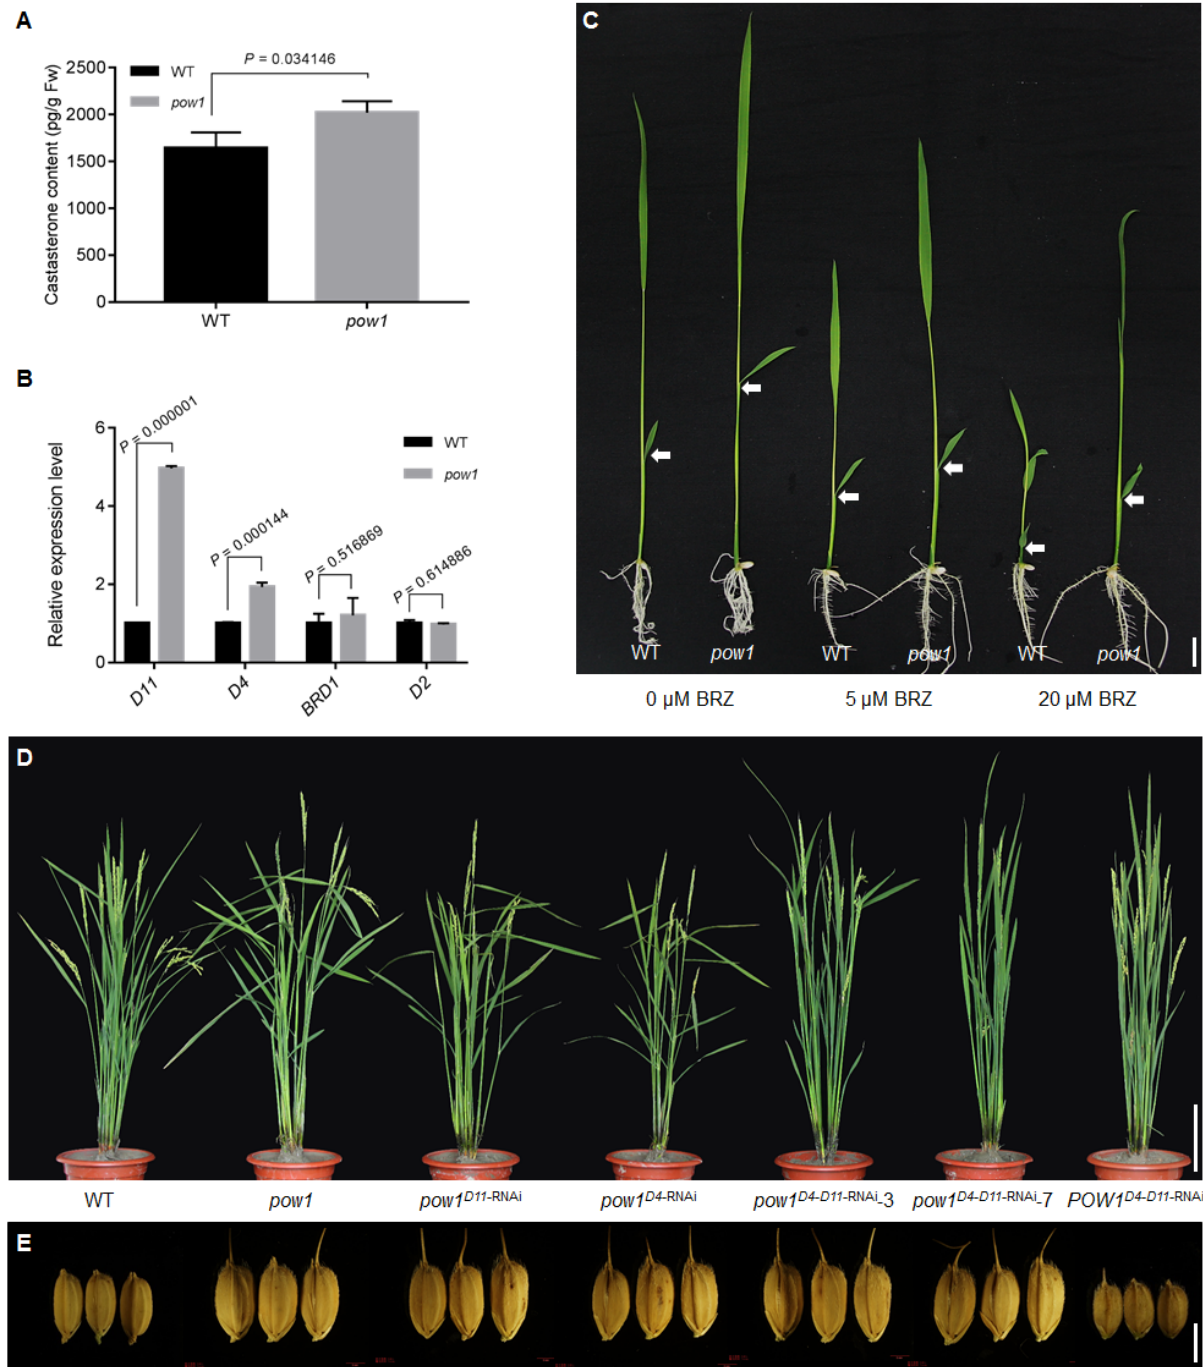

**Figure 4.** *pow1* is a BR-overproducing mutant.

(A) Endogenous BR quantification. Two-month-old field grown plants were sampled. Data are means  $\pm$  SE ( $n = 3$ ). *P* values from the student's *t*-test of *pow1* against WT were indicated.

(B) Expression analysis of BR biosynthesis genes in 2 mm inflorescences for *D11* and flag leaves for *D4*. The transcript levels were normalized against WT, which was set to 1. Data are means  $\pm$  SE ( $n = 3$ ). *P* values from the student's *t*-test of *pow1* against

WT were indicated.

**(C)** BRZ treatment. The sterilized seeds were sowed on half strength MS medium that contained different concentrations of BRZ and cultured for one week after germination. The white arrows indicate the second lamina joints. Scale bar, 1 cm.

**(D)** and **(E)** Comparison of leaf angle and grain size among the *D4* and *D11* RNAi transgenic lines under the background of *pow1* and WT. Scale bars, 20 cm for **(D)** and 5 mm for **(E)**.

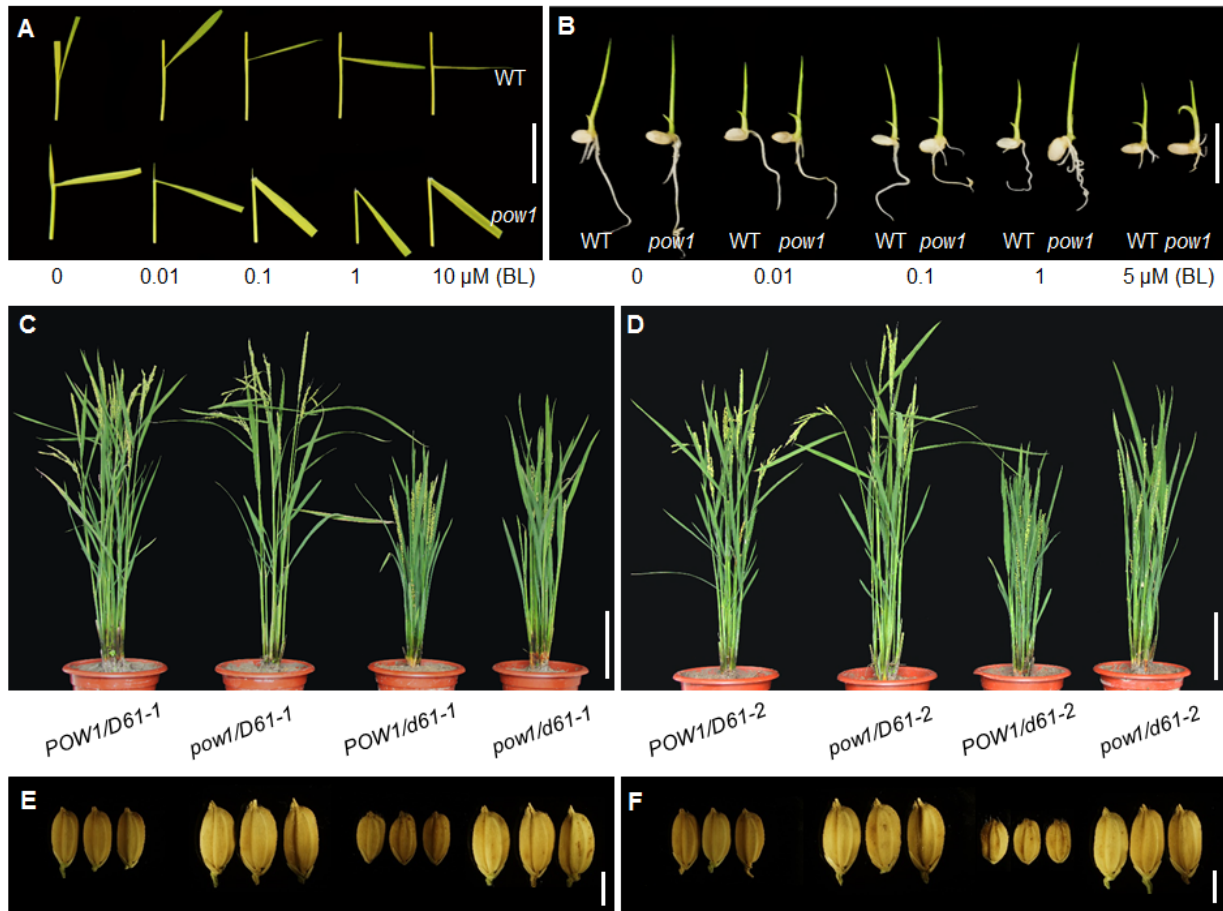

**Figure 5.** *pow1* is a BR-signaling mutant.

(A) Lamina joint assay. The second leaf laminae of 7-day-old dark grown seedlings were excised and submerged in distilled water of different BL concentrations for 3 days. Scale bar, 1 cm.

(B) Coleoptile elongation assay. The coleoptile length of *pow1* and WT grown for 3 days under different BL concentrations was compared. Scale bar, 1 cm.

(C) to (F) Comparison of leaf angle and grain size between *pow1* and *d61/pow1* double mutants. Two allelic mutants of *d61-1* and *d61-2* were used for analysis. Scale bars, 20 cm for (C) and (D), and 5 mm for (E) and (F).

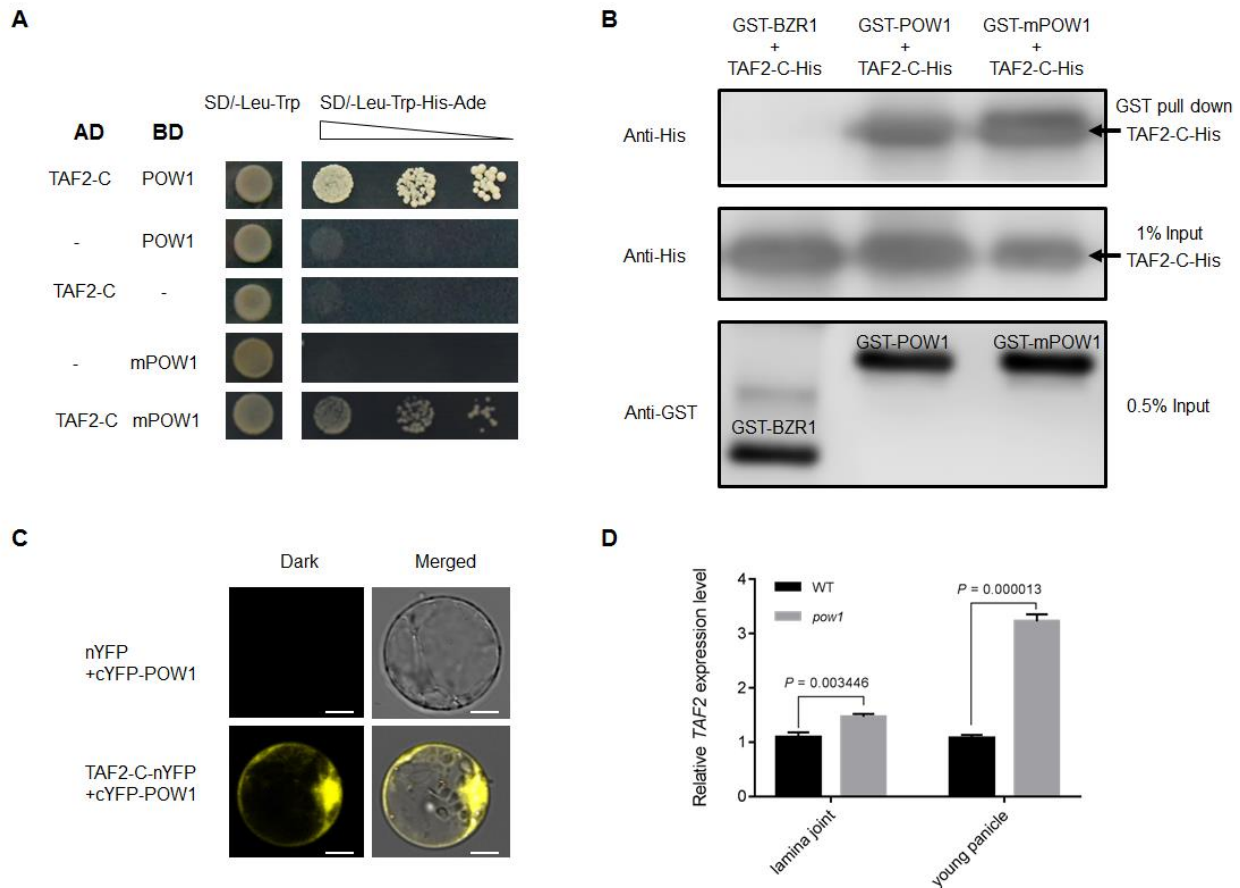

**Figure 6.** Transactivation assay of TAF2 and its interaction with POW1.

(A) to (C) Interaction assay between POW1/mPOW1 and TAF2. GST-OsBZR1 was used as negative control. Scale bars, 10  $\mu$ m.

(D) Expression analysis of *TAF2* in the lamina joint and young panicle of *pow1* and WT. The transcript levels were normalized against WT, which was set to 1. Data are means  $\pm$  SE ( $n = 3$ ). *P* values from the student's *t*-test of *pow1* against WT were indicated.

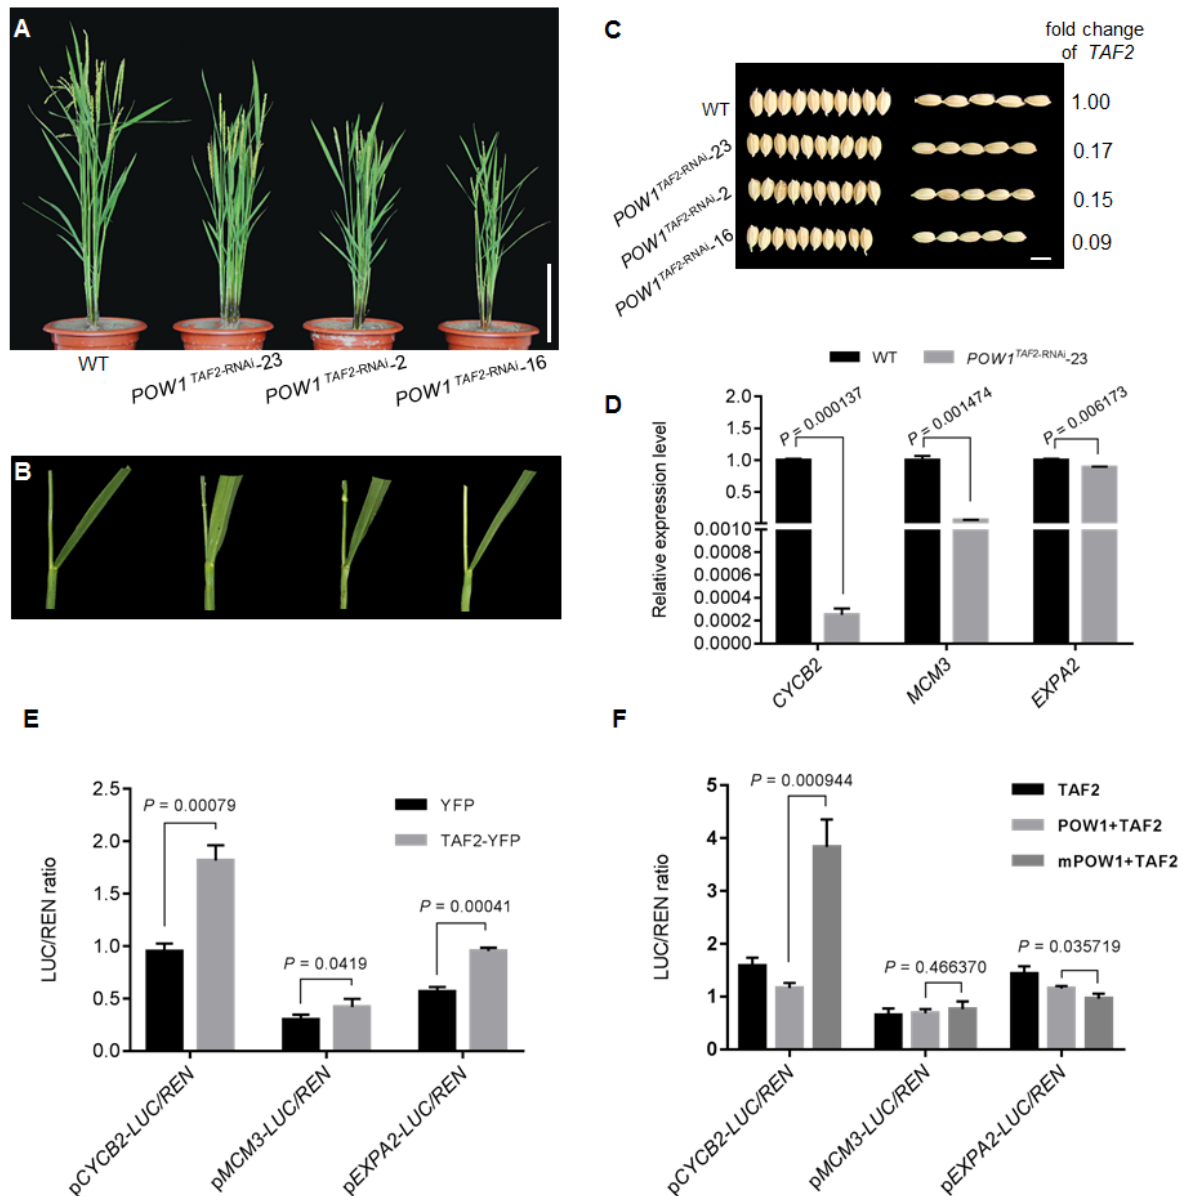

**Figure 7.** *TAF2* is a positive regulator for grain size.

(A) to (C) Phenotypes of plants, leaf angle, and grain size in the *TAF2*-RNAi transgenic lines. Scale bars, 20 cm for (A) and 5 mm for (C).

(D) Expression analysis of cell division and cell expansion related genes in the *TAF2*-RNAi transgenic line. The transcript levels were normalized against WT, which was set to 1. Data are means  $\pm$  SE ( $n = 3$ ). *P* values from the student's *t*-test of the *TAF2*-RNAi transgenic line against WT were indicated.

(E) *TAF2* could effectively activate the transcription of cell division and cell expansion genes. Data are means  $\pm$  SE ( $n = 3$ ). *P* values calculated from the student's *t*-test were indicated.

**(F)** Activation of TAF2 on the transcription of cell division and cell expansion genes were differentially affected by POW1 and mPOW1. Data are means  $\pm$  SE ( $n = 3$ ). *P* values from the student's *t*-test of POW1 against mPOW1 were indicated.



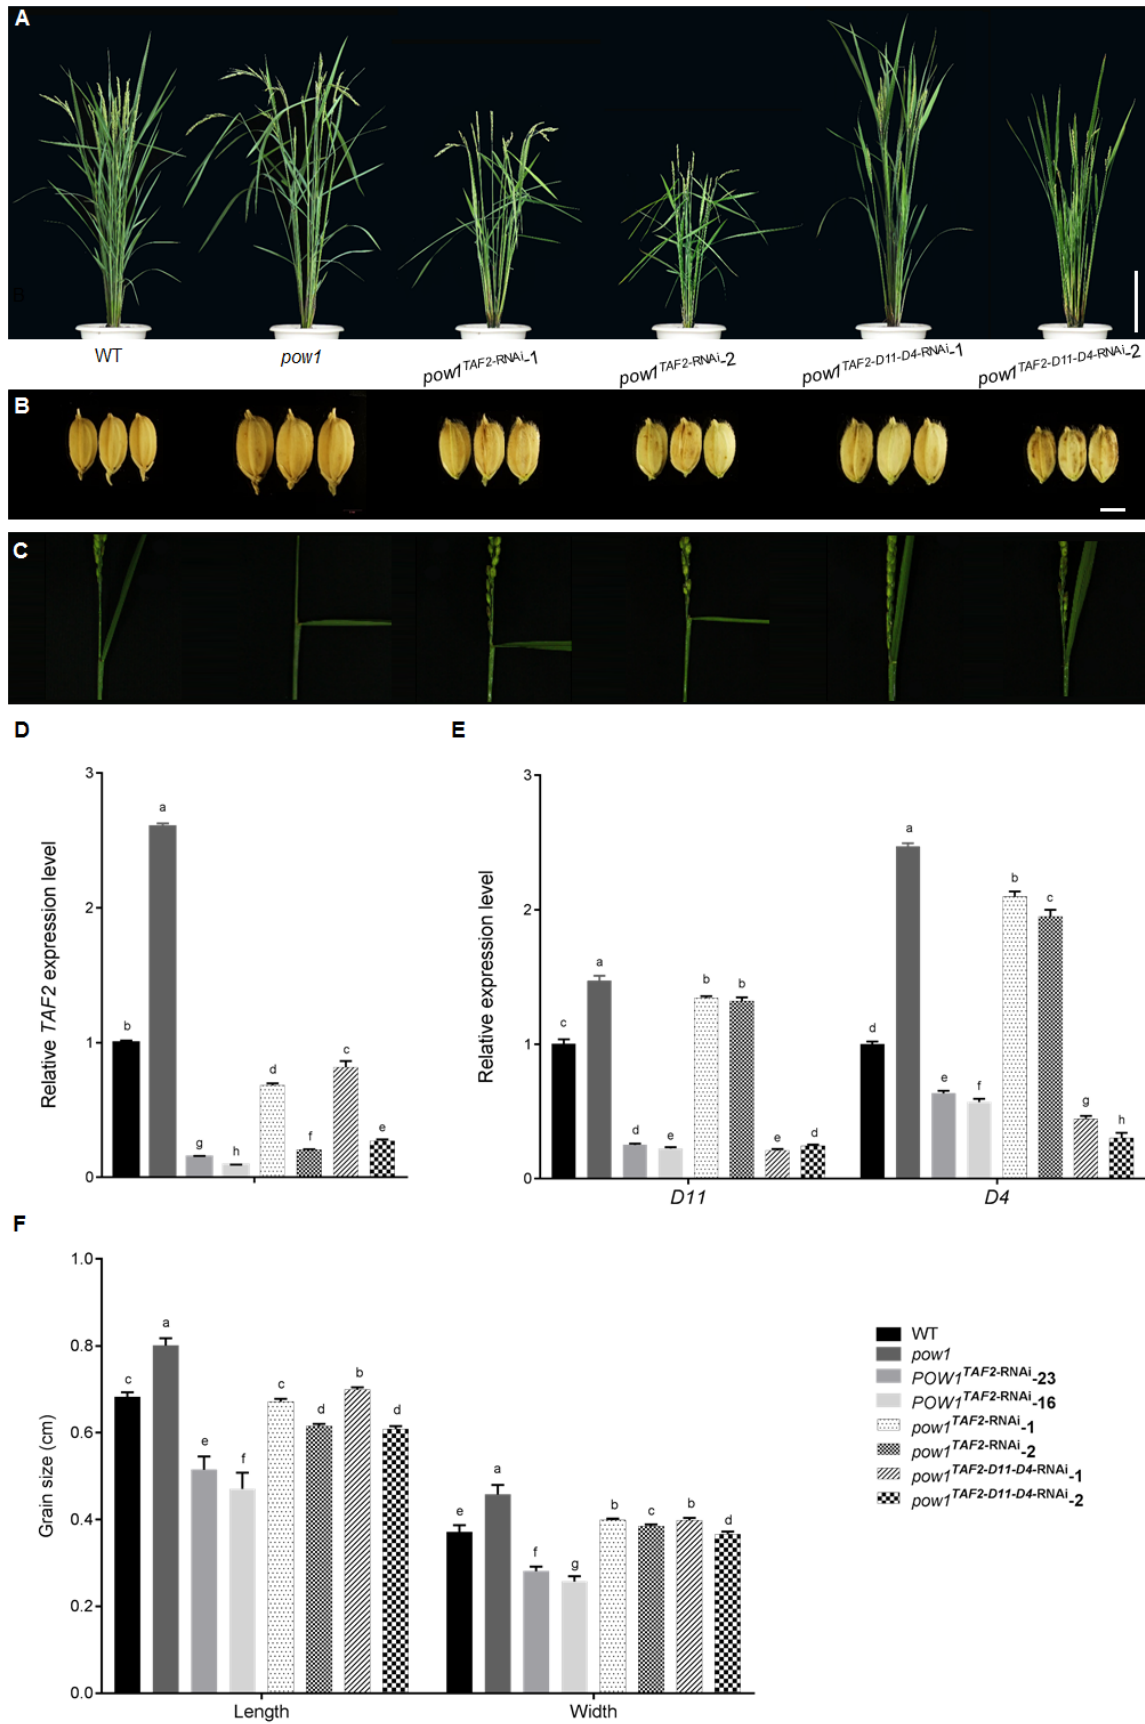

**Figure 8.** Downregulation of *TAF2* could rescue the grain size of *pow1*.

(A) to (C) Phenotypes of plants, grain size, and leaf angle in the *TAF2*-RNAi

transgenic lines under the *pow1* mutant background. Scale bars, 20 cm for **(A)** and 5 mm for **(B)**.

**(D)** and **(E)** Expression analysis of *TAF2*, *D4* and *D11* in the RNAi transgenic lines under the background of *pow1* and WT. The transcript levels were normalized against WT, which was set to 1. Data are means  $\pm$  SE ( $n = 3$ ). Bars followed by the different letters represent significant difference at 5%.

**(F)** Statistical analysis of grain length and grain width in the RNAi transgenic lines under the background of *pow1* and WT. Data are means  $\pm$  SE ( $n = 15$ ). Bars followed by the different letters represent significant difference at 5%.

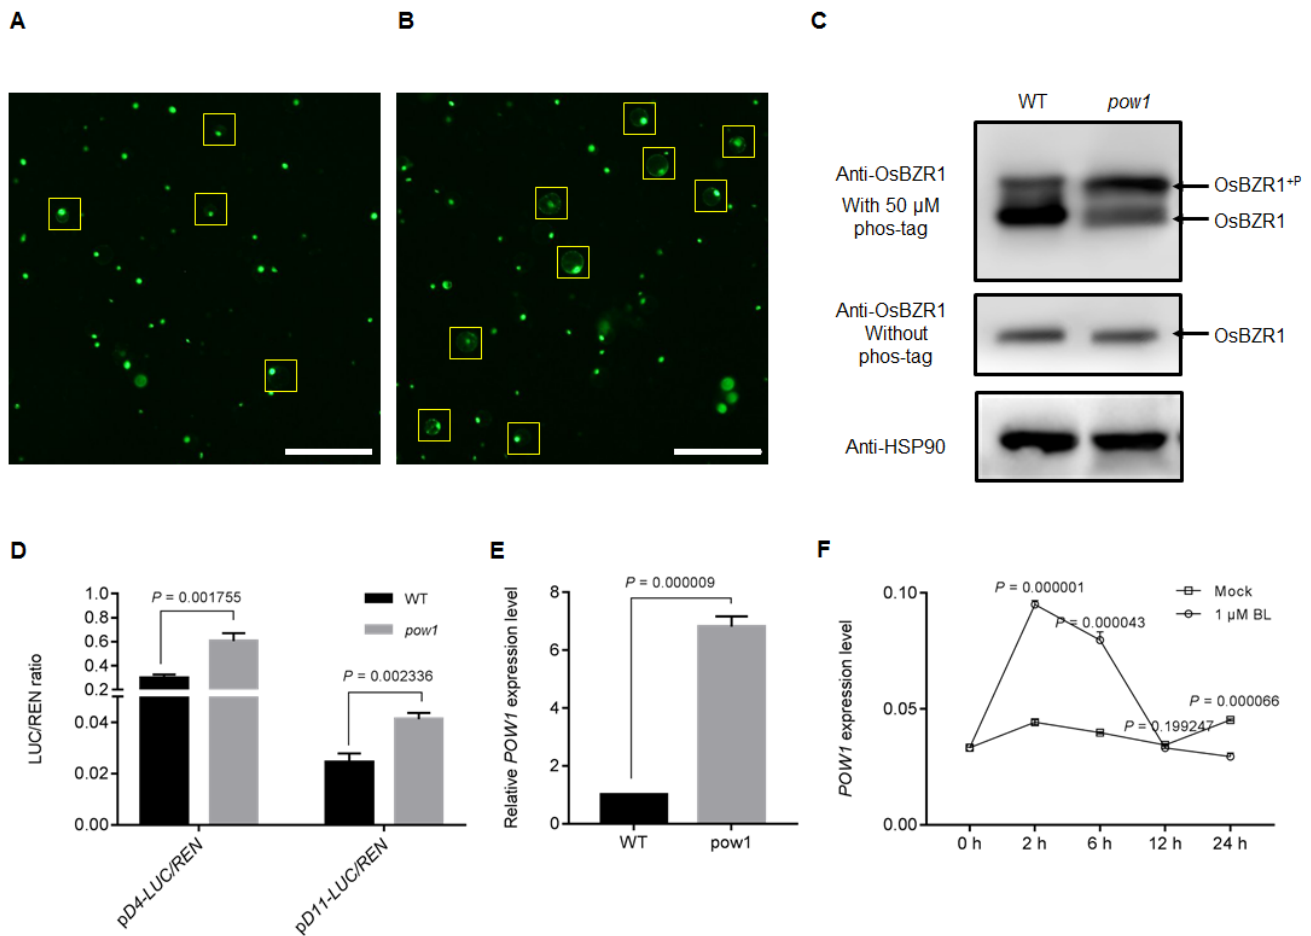

**Figure 9.** *POW1* affects BR homeostasis by altering OsBZR1 subcellular localization.

(A) and (B) Protein localization. OsBZR1-YFP localizes mostly in the nuclear of WT protoplast (A), while the signals were mostly observed in the cytoplasm of *pow1* protoplast (B). Scale bars, 200  $\mu$ m.

(C) Phosphorylation assay. Indicating that *pow1* possesses more phosphorylated OsBZR1.

(D) Transactivation activity assay. Indicating that the mutation of *POW1* reduces the inhibition of OsBZR1 on *D4* and *D11* expression.

(E) Comparison of *POW1* expression between *pow1* and WT. The transcript levels were normalized against WT, which was set to 1.

(F) BR induction assay. The whole shoots of two-week-old seedlings under 1  $\mu$ M BL were collected after 0, 2, 6, 12, and 24 h treatment. Data in (D)-(F) are means  $\pm$  SE ( $n = 3$ ), and  $P$  values from the student's  $t$ -test were indicated.

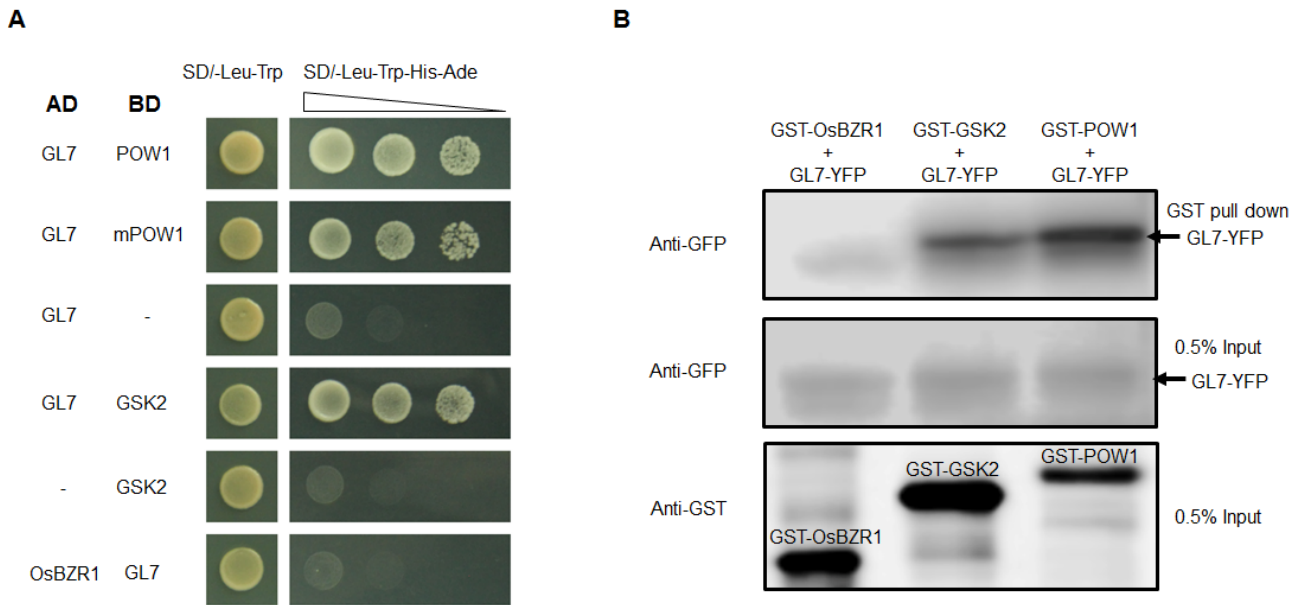

**Figure 10.** GL7 might be a linker between POW1 and BR pathway.

(A) Interaction assay. GL7 could interact with POW1 and GSK2 but not OsBZR1 in yeast.

(B) Semi-pull down assay. Indicating the interaction between GL7 and POW1/GSK2. GST-OsBZR1 was used as the negative control.

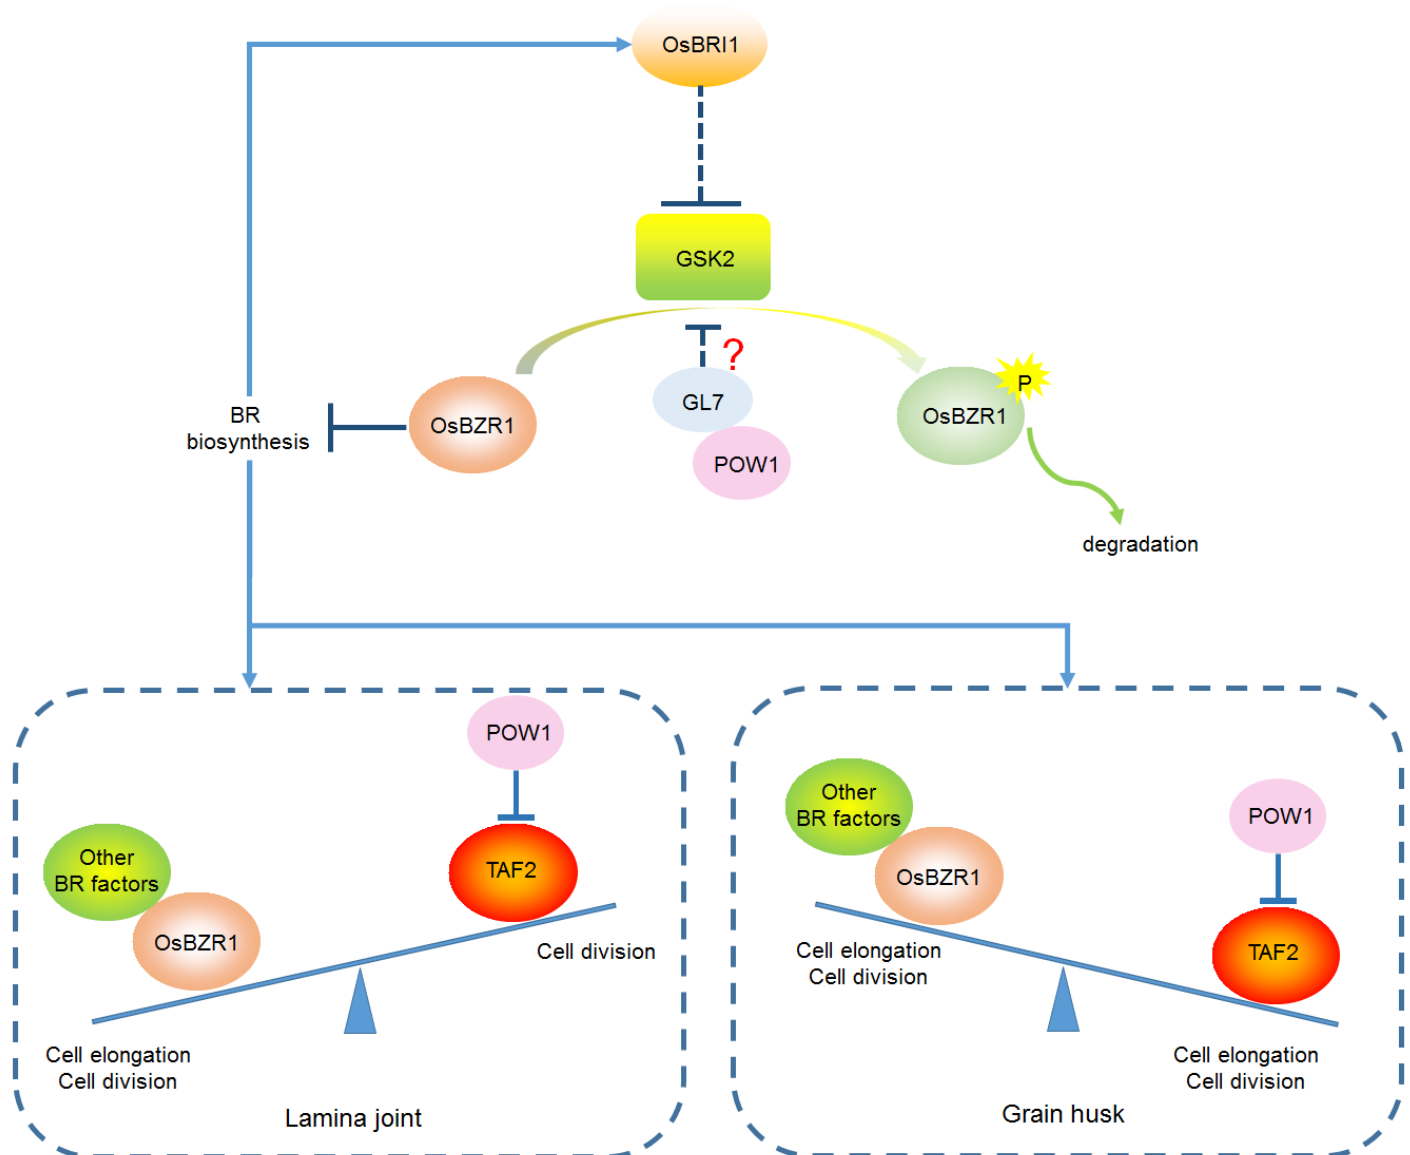

**Figure 11.** The putative working model of *POW1* in separable regulation of grain size and leaf angle development. *POW1* is a key factor in the BR pathway by affecting *OsBZR1* phosphorylation, and participates in *TAF2*-mediated cell cycle progression through inhibiting *TAF2* transactivation activity. In the lamina joint, the little effect of *TAF2* on cell elongation leads to the dominant role of BR in leaf angle formation. While in the young panicle, the marked role of *TAF2* in cell division and cell elongation gives rise to the *TAF2*-dominated grain size development. The red question mark indicates that it is not clear whether *GL7* is the direct linker between *POW1* and *GSK2* to regulate the phosphorylation of *OsBZR1*.

## Parsed Citations

Asahara, H., Santoso, B., Guzman, E., Du, K., Cole, P.A, Davidson, I., and Montminy, M. (2001). Chromatin-dependent cooperativity between constitutive and inducible activation domains in CREB. *Mol. Cell. Biol.* 21, 7892-7900.

Pubmed: [Author and Title](#)

Google Scholar: [Author Only Title Only Author and Title](#)

Asami, T., Mizutani, M., Fujioka, S., Goda, H., Min, Y.K., Shimada, Y., Nakano, T., Takatsuto, S., Matsuyama, T., Nagata, N., Sakata, K., and Yoshida, S. (2001). Selective interaction of triazole derivatives with DWF4, a cytochrome P450 monooxygenase of the brassinosteroid biosynthetic pathway, correlates with brassinosteroid deficiency in *Planta*. *J. Biol. Chem.* 276, 25687-25691.

Pubmed: [Author and Title](#)

Google Scholar: [Author Only Title Only Author and Title](#)

Bahat, A., Kedmi, R., Gazit, K., Richardo-Lax, I., Ainbinder, E., and Dikstein, R. (2013). TAF4b and TAF4 differentially regulate mouse embryonic stem cells maintenance and proliferation. *Genes Cells* 18, 225-237.

Pubmed: [Author and Title](#)

Google Scholar: [Author Only Title Only Author and Title](#)

Bai, M.Y., Zhang, L.Y., Gampala, S.S., Zhu, S.W., Song, W.Y., Chong, K., and Wang, Z.Y. (2007). Functions of OsBZR1 and 14-3-3 proteins in brassinosteroid signaling in rice. *Proc. Natl. Acad. Sci. USA* 104, 13839-13844.

Pubmed: [Author and Title](#)

Google Scholar: [Author Only Title Only Author and Title](#)

Bertrand, C., Benhamed, M., Li, Y.F., Ayadi, M., Lemonnier, G., Renou, J.P., Delarue, M., and Zhou, D.X. (2005). Arabidopsis HAF2 gene encoding TATA-binding protein (TBP)-associated factor TAF1, is required to integrate light signals to regulate gene expression and growth. *J. Biol. Chem.* 280, 1465-1473.

Pubmed: [Author and Title](#)

Google Scholar: [Author Only Title Only Author and Title](#)

Cao, H., and Chen, S. (1995). Brassinosteroid-induced rice lamina joint inclination and its relation to indole-3-acetic acid and ethylene. *Plant Growth Regul.* 16, 189-196.

Pubmed: [Author and Title](#)

Google Scholar: [Author Only Title Only Author and Title](#)

Chen, Z., and Manley, J.L. (2000). Robust mRNA transcription in chicken DT40 cells depleted of TAFII31 suggests both functional degeneracy and evolutionary divergence. *Mol. Cell. Biol.* 20, 5064-5076.

Pubmed: [Author and Title](#)

Google Scholar: [Author Only Title Only Author and Title](#)

Duan, Y., Li, S., Chen, Z., Zheng, L., Diao, Z., Zhou, Y., Lan, T., Guan, H., Pan, R., Xue, Y., and Wu, W. (2012). Dwarf and deformed flower 1, encoding an F-box protein, is critical for vegetative and floral development in rice (*Oryza sativa* L.). *Plant J.* 72, 829-842.

Pubmed: [Author and Title](#)

Google Scholar: [Author Only Title Only Author and Title](#)

Eom, H., Park, S.J., Kim, M.K., Kim, H., Kang, H., and Lee, I. (2018). TAF15b, involved in the autonomous pathway for flowering, represses transcription of FLOWERING LOCUS C. *Plant J.* 93, 79-91.

Pubmed: [Author and Title](#)

Google Scholar: [Author Only Title Only Author and Title](#)

Garbett, K.A., Tripathi, M.K., Cencki, B., Layer, J.H., and Weil, P.A. (2007). Yeast TFIID serves as a coactivator for Rap1p by direct protein-protein interaction. *Mol. Cell. Biol.* 27, 297-311.

Pubmed: [Author and Title](#)

Google Scholar: [Author Only Title Only Author and Title](#)

Gupta, K., Sari-Ak, D., Haffke, M., Trowitzsch, S., and Berger, I. (2016). Zooming in on transcription preinitiation. *J. Mol. Biol.* 428, 2581-2591.

Pubmed: [Author and Title](#)

Google Scholar: [Author Only Title Only Author and Title](#)

Hong, Z., Ueguchi Tanaka, M., Umemura, K., Uozu, S., Fujioka, S., Takatsuto, S., Yoshida, S., Ashikari, M., Kitano, H., and Matsuoka, M. (2003). A rice brassinosteroid-deficient mutant, ebisu dwarf (d2), is caused by a loss of function of a new member of cytochrome P450. *Plant Cell* 15, 2900-2910.

Pubmed: [Author and Title](#)

Google Scholar: [Author Only Title Only Author and Title](#)

Jacobson, R.H., Ladurner, A.G., King, D.S., and Tjian, R. (2000). Structure and function of a Human TAFII 250 double bromodomain module. *Science (New York, N.Y.)* 288, 1422-1425.

Pubmed: [Author and Title](#)

Google Scholar: [Author Only Title Only Author and Title](#)

Jiang, P., Wang, S., Zheng, H., Li, H., Zhang, F., Su, Y., Xu, Z., Lin, H., Qian, Q., and Ding, Y. (2018). SIP1 participates in regulation of flowering time in rice by recruiting OsTrx1 to Ehd1. *New Phytol.* 219, 422-435.

Pubmed: [Author and Title](#)

Google Scholar: [Author Only Title Only Author and Title](#)

Jiang, Y., Bao, L., Jeong, S.Y., Kim, S.K., Xu, C., Li, X., and Zhang, Q. (2012). XIAO is involved in the control of organ size by contributing to the regulation of signaling and homeostasis of brassinosteroids and cell cycling in rice. *Plant J.* 70, 398-408.

Pubmed: [Author and Title](#)

Google Scholar: [Author Only Title Only Author and Title](#)

Kapitonov, V.V., and Jurka, J. (1999). Molecular paleontology of transposable elements from *Arabidopsis thaliana*. *Genetica* 107, 27-37.

Pubmed: [Author and Title](#)

Google Scholar: [Author Only Title Only Author and Title](#)

Kapitonov, V.V., and Jurka, J. (2004). Harbinger transposons and an ancient HARBI1 gene derived from a transposase. *DNA Cell Biol.* 23, 311-324.

Pubmed: [Author and Title](#)

Google Scholar: [Author Only Title Only Author and Title](#)

Kim, B.K., Fujioka, S., Takatsuto, S., Tsujimoto, M., and Choe, S. (2008). Castasterone is a likely end product of brassinosteroid biosynthetic pathway in rice. *Biochem. Biophys. Res. Commun.* 374, 614-619.

Pubmed: [Author and Title](#)

Google Scholar: [Author Only Title Only Author and Title](#)

Lago, C., Clerici, E., Mizzi, L., Colombo, L., and Kater, M.M. (2004). TBP-associated factors in *Arabidopsis*. *Gene* 342, 231-241.

Pubmed: [Author and Title](#)

Google Scholar: [Author Only Title Only Author and Title](#)

Lago, C., Clerici, E., Dreni, L., Horlow, C., Caporali, E., Colombo, L., and Kater, M.M. (2005). The *Arabidopsis* TFIIID factor AtTAF6 controls pollen tube growth. *Dev. Biol.* 285, 91-100.

Pubmed: [Author and Title](#)

Google Scholar: [Author Only Title Only Author and Title](#)

Li, N., Xu, R., Duan, P., and Li, Y. (2018). Control of grain size in rice. In *Plant Reproduction*, pp. 1-15.

Pubmed: [Author and Title](#)

Google Scholar: [Author Only Title Only Author and Title](#)

Liang, S.C., Hartwig, B., Perera, P., Mora-García, S., de Leau, E., Thornton, H., de Alves, F.L., Rapsilber, J., Yang, S., James, G.V., Schneeberger, K., Finnegan, E.J., Turck, F., and Goodrich, J. (2015). Kicking against the PRCs – A domesticated transposase antagonises silencing mediated by Polycomb Group Proteins and is an accessory component of polycomb repressive complex 2. *PLoS Genet.* 11, e1005660.

Pubmed: [Author and Title](#)

Google Scholar: [Author Only Title Only Author and Title](#)

Lindner, M., Simonini, S., Kooiker, M., Gagliardini, V., Somssich, M., Hohenstatt, M., Simon, R., Grossniklaus, U., and Kater, M.M. (2013). TAF13 interacts with PRC2 members and is essential for *Arabidopsis* seed development. *Dev. Biol.* 379, 28-37.

Pubmed: [Author and Title](#)

Google Scholar: [Author Only Title Only Author and Title](#)

Liu, J., Chen, J., Zheng, X., Wu, F., Lin, Q., Heng, Y., Tian, P., Cheng, Z., Yu, X., Zhou, K., Zhang, X., Guo, X., Wang, J., Wang, H., and Wan, J. (2017). GW5 acts in the brassinosteroid signalling pathway to regulate grain width and weight in rice. *Nat. Plants* 3.

Pubmed: [Author and Title](#)

Google Scholar: [Author Only Title Only Author and Title](#)

Metzger, D., Scheer, E., Soldatov, A., and Tora, L. (1999). Mammalian TAFII30 is required for cell cycle progression and specific cellular differentiation programmes. *EMBO J.* 18, 4823-4834.

Pubmed: [Author and Title](#)

Google Scholar: [Author Only Title Only Author and Title](#)

Mori, M., Nomura, T., Ooka, H., Ishizaka, M., Yokota, T., Sugimoto, K., Okabe, K., Kajiwara, H., Satoh, K., Yamamoto, K., Hirochika, H., and Kikuchi, S. (2002). Isolation and characterization of a rice dwarf mutant with a defect in brassinosteroid biosynthesis. *Plant Physiol.* 130, 1152-1161.

Pubmed: [Author and Title](#)

Google Scholar: [Author Only Title Only Author and Title](#)

Morinaka, Y., Sakamoto, T., Inukai, Y., Agetsuma, M., Kitano, H., Ashikari, M., and Matsuoka, M. (2006). Morphological alteration caused by brassinosteroid insensitivity increases the biomass and grain production of rice. *Plant Physiol.* 141, 924-931.

Pubmed: [Author and Title](#)

Google Scholar: [Author Only Title Only Author and Title](#)

Ning, J., Zhang, B., Wang, N., Zhou, Y., and Xiong, L. (2011). Increased Leaf Angle1, a Raf-Like MAPKKK that interacts with a nuclear protein family, regulates mechanical tissue formation in the lamina joint of rice. *Plant Cell* 23, 4334-4347.

Pubmed: [Author and Title](#)

Google Scholar: [Author Only Title Only Author and Title](#)

Nogales, E., Louder, R.K., and He, Y. (2017). Structural insights into the eukaryotic transcription initiation machinery. *Annu. Rev. Biophys.* 46, 59-83.

Pubmed: [Author and Title](#)

Google Scholar: [Author Only Title Only Author and Title](#)

Qiao, S.L., Sun, S.Y., Wang, L.L., Wu, Z.H., Li, C.X., Li, X.M., Wang, T., Leng, L.N., Tian, W.S., Lu, T.G., and Wang, X.L. (2017). The RLA1/SMOS1 transcription factor functions with OsBZR1 to regulate brassinosteroid signaling and rice architecture. *Plant Cell* 29, 292-309.

Pubmed: [Author and Title](#)

Google Scholar: [Author Only](#) [Title Only](#) [Author and Title](#)

Reeves, W.M., and Hahn, S. (2005). Targets of the Gal4 transcription activator in functional transcription complexes. *Mol. Cell. Biol.* 25, 9092-9102.

Pubmed: [Author and Title](#)

Google Scholar: [Author Only](#) [Title Only](#) [Author and Title](#)

Rojo Niersbach, E., Furukawa, T., and Tanese, N. (1999). Genetic dissection of hTAFII130 defines a hydrophobic surface required for interaction with glutamine-rich activators. *J. Biol. Chem.* 274, 33778-33784.

Pubmed: [Author and Title](#)

Google Scholar: [Author Only](#) [Title Only](#) [Author and Title](#)

Sakamoto, T., Morinaka, Y., Ohnishi, T., Sunohara, H., Fujioka, S., Ueguchi Tanaka, M., Mizutani, M., Sakata, K., Takatsuto, S., Yoshida, S., Tanaka, H., Kitano, H., and Matsuoka, M. (2006). Erect leaves caused by brassinosteroid deficiency increase biomass production and grain yield in rice. *Nat. Biotech.* 24, 105-109.

Pubmed: [Author and Title](#)

Google Scholar: [Author Only](#) [Title Only](#) [Author and Title](#)

Sekiguchi, T., Nohiro, Y., Nakamura, Y., Hisamoto, N., and Nishimoto, T. (1991). The human CCG1 gene, essential for progression of the G1 phase, encodes a 210-kilodalton nuclear DNA-binding protein. *Mol. Cell. Biol.* 11, 3317-3325.

Pubmed: [Author and Title](#)

Google Scholar: [Author Only](#) [Title Only](#) [Author and Title](#)

Shi, Z., Wang, J., Wan, X., Shen, G., Wang, X., and Zhang, J. (2007). Over-expression of rice OsAGO7 gene induces upward curling of the leaf blade that enhanced erect-leaf habit. *Planta* 226, 99-108.

Pubmed: [Author and Title](#)

Google Scholar: [Author Only](#) [Title Only](#) [Author and Title](#)

Shimada, A., Ueguchi-Tanaka, M., Sakamoto, T., Fujioka, S., Takatsuto, S., Yoshida, S., Sazuka, T., Ashikari, M., and Matsuoka, M. (2006). The rice SPINDLY gene functions as a negative regulator of gibberellin signaling by controlling the suppressive function of the DELLA protein, SLR1, and modulating brassinosteroid synthesis. *Plant J.* 48, 390-402.

Pubmed: [Author and Title](#)

Google Scholar: [Author Only](#) [Title Only](#) [Author and Title](#)

Sridhar, V.V., Surendrarao, A., and Liu, Z. (2006). APETALA1 and SEPALLATA3 interact with SEUSS to mediate transcription repression during flower development *Development* 133, 3159-3166.

Pubmed: [Author and Title](#)

Google Scholar: [Author Only](#) [Title Only](#) [Author and Title](#)

Tamada, Y., Nakamori, K., Nakatani, H., Matsuda, K., Hata, S., Furumoto, T., and Izui, K. (2007). Temporary expression of the TAF10 gene and its requirement for normal development of *Arabidopsis thaliana*. *Plant Cell Physiol.* 48, 134-146.

Pubmed: [Author and Title](#)

Google Scholar: [Author Only](#) [Title Only](#) [Author and Title](#)

Tanabe, S., Ashikari, M., Fujioka, S., Takatsuto, S., Yoshida, S., Yano, M., Yoshimura, A., Kitano, H., Matsuoka, M., Fujisawa, Y., Kato, H., and Iwasaki, Y. (2005). A novel cytochrome P450 is implicated in brassinosteroid biosynthesis via the characterization of a rice dwarf mutant, dwarf11, with reduced seed length. *Plant Cell* 17, 776-790.

Pubmed: [Author and Title](#)

Google Scholar: [Author Only](#) [Title Only](#) [Author and Title](#)

Tian, J., Wang, C., Xia, J., Wu, L., Xu, G., Wu, W., Li, D., Qin, W., Han, X., Chen, Q., Jin, W., and Tian, F. (2019). Teosinte ligule allele narrows plant architecture and enhances high-density maize yields. *Science (New York, N.Y.)* 365, 658-664.

Pubmed: [Author and Title](#)

Google Scholar: [Author Only](#) [Title Only](#) [Author and Title](#)

Tong, H., and Chu, C. (2018). Functional specificities of brassinosteroid and potential utilization for crop improvement. *Trends Plant Sci.* 23, 1016-1028.

Pubmed: [Author and Title](#)

Google Scholar: [Author Only](#) [Title Only](#) [Author and Title](#)

Tong, H., Liu, L., Jin, Y., Du, L., Yin, Y., Qian, Q., Zhu, L., and Chu, C. (2012). DWARF AND LOW-TILLERING acts as a direct downstream target of a GSK3/SHAGGY-Like kinase to mediate brassinosteroid responses in rice. *Plant Cell* 24, 2562-2577.

Pubmed: [Author and Title](#)

Google Scholar: [Author Only](#) [Title Only](#) [Author and Title](#)

Tong, H., Jin, Y., Liu, W., Li, F., Fang, J., Yin, Y., Qian, Q., Zhu, L., and Chu, C. (2009). DWARF AND LOW-TILLERING, a new member of the GRAS family, plays positive roles in brassinosteroid signaling in rice. *Plant J.* 58, 803-816.

Pubmed: [Author and Title](#)

Google Scholar: [Author Only](#) [Title Only](#) [Author and Title](#)



- Tong, H., Xiao, Y., Liu, D., Gao, S., Liu, L., Yin, Y., Jin, Y., Qian, Q., and Chu, C. (2014).** Brassinosteroid regulates cell elongation by modulating gibberellin metabolism in rice. *Plant Cell* 26, 4376-4393.  
Pubmed: [Author and Title](#)  
Google Scholar: [Author Only Title Only Author and Title](#)
- Wang, S.K., Li, S., Liu, Q., Wu, K., Zhang, J.Q., Wang, S.S., Wang, Y., Chen, X.B., Zhang, Y., Gao, C.X., Wang, F., Huang, H.X., and Fu, X.D. (2015a).** The OsSPL16-GW7 regulatory module determines grain shape and simultaneously improves rice yield and grain quality. *Nat. Genet.* 47, 949-954.  
Pubmed: [Author and Title](#)  
Google Scholar: [Author Only Title Only Author and Title](#)
- Wang, Y., Xiong, G., Hu, J., Jiang, L., Yu, H., Xu, J., Fang, Y., Zeng, L., Xu, E., Xu, J., Ye, W., Meng, X., Liu, R., Chen, H., Jing, Y., Wang, Y., Zhu, X., Li, J., and Qian, Q. (2015b).** Copy number variation at the GL7 locus contributes to grain size diversity in rice. *Nat. Genet.* 47, 944.  
Pubmed: [Author and Title](#)  
Google Scholar: [Author Only Title Only Author and Title](#)
- Wang, Z.Y., Bai, M.Y., Oh, E., and Zhu, J.Y. (2012).** Brassinosteroid signaling network and regulation of photomorphogenesis. *Annu. Rev. Genet.* 46, 701-724.  
Pubmed: [Author and Title](#)  
Google Scholar: [Author Only Title Only Author and Title](#)
- Waterworth, W.M., Drury, G.E., Hunter, G.B., and West, C.E. (2015).** Arabidopsis TAF1 is an MRE11-interacting protein required for resistance to genotoxic stress and viability of the male gametophyte. *Plant J.* 84, 545-557.  
Pubmed: [Author and Title](#)  
Google Scholar: [Author Only Title Only Author and Title](#)
- Weake, V.M., and Workman, J.L. (2010).** Inducible gene expression: diverse regulatory mechanisms. *Nat. Rev. Genet.* 11, 426-437.  
Pubmed: [Author and Title](#)  
Google Scholar: [Author Only Title Only Author and Title](#)
- Wu, C.Y., Trieu, A., Radhakrishnan, P., Kwok, S.F., Harris, S., Zhang, K., Wang, J.L., Wan, J.M., Zhai, H.Q., Takatsuto, S., Matsumoto, S., Fujioka, S., Feldmann, K.A., and Pennell, R.I. (2008).** Brassinosteroids regulate grain filling in rice. *Plant Cell* 20, 2130-2145.  
Pubmed: [Author and Title](#)  
Google Scholar: [Author Only Title Only Author and Title](#)
- Xin, P., Yan, J., Fan, J., Chu, J., and Yan, C. (2013).** An improved simplified high-sensitivity quantification method for determining brassinosteroids in different tissues of rice and Arabidopsis. *Plant Physiol.* 162, 2056-2066.  
Pubmed: [Author and Title](#)  
Google Scholar: [Author Only Title Only Author and Title](#)
- Yamamoto, C., Ihara, Y., Wu, X., Noguchi, T., Fujioka, S., Takatsuto, S., Ashikari, M., Kitano, H., and Matsuoka, M. (2000).** Loss of function of a rice brassinosteroid insensitive 1 homolog prevents internode elongation and bending of the lamina joint. *Plant Cell* 12, 1591-1605.  
Pubmed: [Author and Title](#)  
Google Scholar: [Author Only Title Only Author and Title](#)
- Yuan, Y.W., and Wessler, S.R. (2011).** The catalytic domain of all eukaryotic cut-and-paste transposase superfamilies. *Proc. Natl. Acad. Sci. USA* 108, 7884-7889.  
Pubmed: [Author and Title](#)  
Google Scholar: [Author Only Title Only Author and Title](#)
- Zhu, X., Liang, W., Cui, X., Chen, M., Yin, C., Luo, Z., Zhu, J., Lucas, W.J., Wang, Z., and Zhang, D. (2015).** Brassinosteroids promote development of rice pollen grains and seeds by triggering expression of Carbon Starved Anther, a MYB domain protein. *Plant J.* 82, 570-581.  
Pubmed: [Author and Title](#)  
Google Scholar: [Author Only Title Only Author and Title](#)
- Zuo, J., and Li, J. (2014).** Molecular genetic dissection of quantitative trait loci regulating rice grain size. *Annu. Rev. Genet.* 48, 99-118.  
Pubmed: [Author and Title](#)  
Google Scholar: [Author Only Title Only Author and Title](#)
